# Supplementary material for: Identification of RAN1 orthologue associated with sex determination through whole genome sequencing analysis in fig (Ficus carica L.)
Source: PubMed Central journal article supplement (PMC5264649; doi:10.1038/srep41124), 2017-01-25
Supplement: srep41124-s1.pdf [file srep41124-s1.pdf]

## Identification of *RANI* orthologue associated with sex determination through whole genome sequencing analysis in fig (*Ficus carica* L.)

Kazuki Mori<sup>1</sup>, Kenta Shirasawa<sup>2</sup>, Hitoshi Nogata<sup>3,4</sup>, Chiharu Hirata<sup>5</sup>, Kosuke Tashiro<sup>1</sup>, Tsuyoshi Habu<sup>6</sup>, Sangwan Kim<sup>1</sup>, Shuichi Himeno<sup>3</sup>, Satoru Kuhara<sup>1</sup> & Hidetoshi Ikegami<sup>3\*</sup>

<sup>1</sup>Faculty of Agriculture, Kyushu University, Fukuoka, Japan

<sup>2</sup>Kazusa DNA Research Institute, Kisarazu, Chiba, Japan

<sup>3</sup>Fukuoka Agriculture and Forestry Research Center Buzen Branch, Yukuhashi, Fukuoka, Japan

<sup>4</sup>Fukuoka Keichiku Agricultural Extension Center, Fukuoka, Japan

<sup>5</sup>Fukuoka Agriculture and Forestry Research Center, Fukuoka, Japan

<sup>6</sup>Graduate School of Agriculture, Ehime University, Ehime, Japan

<sup>7</sup>K. M., K. S. and H. I. contributed equally to this work.

\*Address correspondence to: Hidetoshi Ikegami

E-mail: [ikegami@farc.pref.fukuoka.jp](mailto:ikegami@farc.pref.fukuoka.jp)

Present Address: Fukuoka Agriculture and Forestry Research Center Buzen Branch, 2-4-1 Nishiizumi, Yukuhashi, Fukuoka 824-0038, Japan

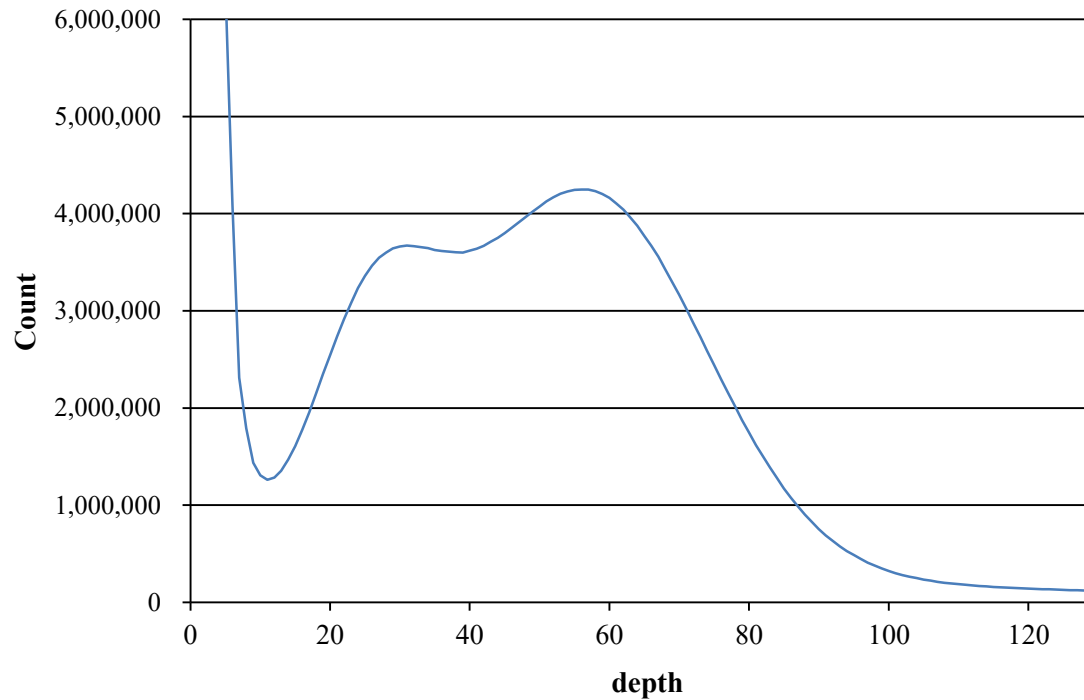

**Supplementary Figure S1.** 21-mer frequency distribution analysis of sequencing reads. A K-mer refers to an artificial sequence division of K nucleotides. The x-axis is depth (X); the y-axis is the proportion, which represents the frequency at that depth divide by the total frequency of all the depth. The high heterozygosity rate of jujube caused a sub peak (depth 30X) at the position of the half of the main peak (depth 60X).

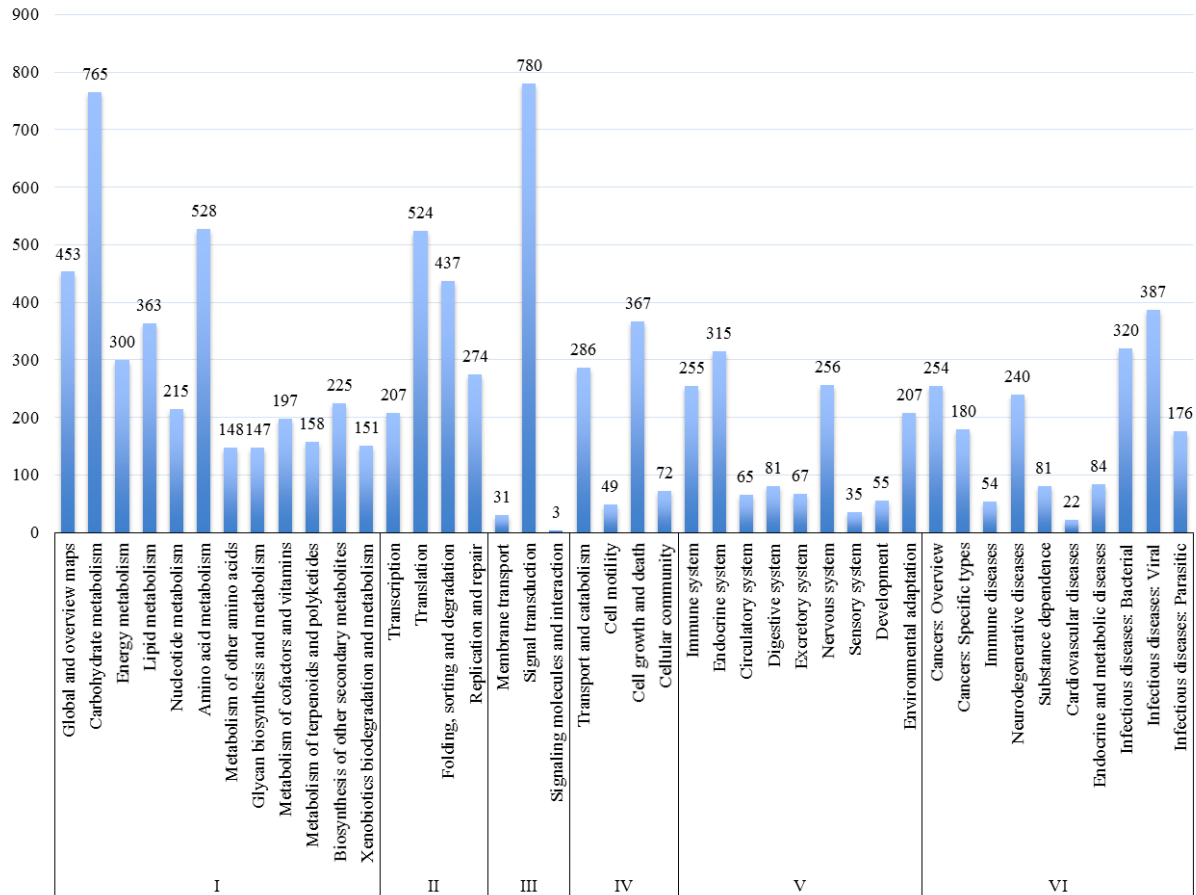

**Supplementary Figure S2.** Distribution of KEGG pathway frequency in the predicted gene set. I, Metabolism; II, Genetic Information Processing; III, Environmental Information Processing; IV, Cellular Processes; V, Organismal Systems; VI, Human Diseases

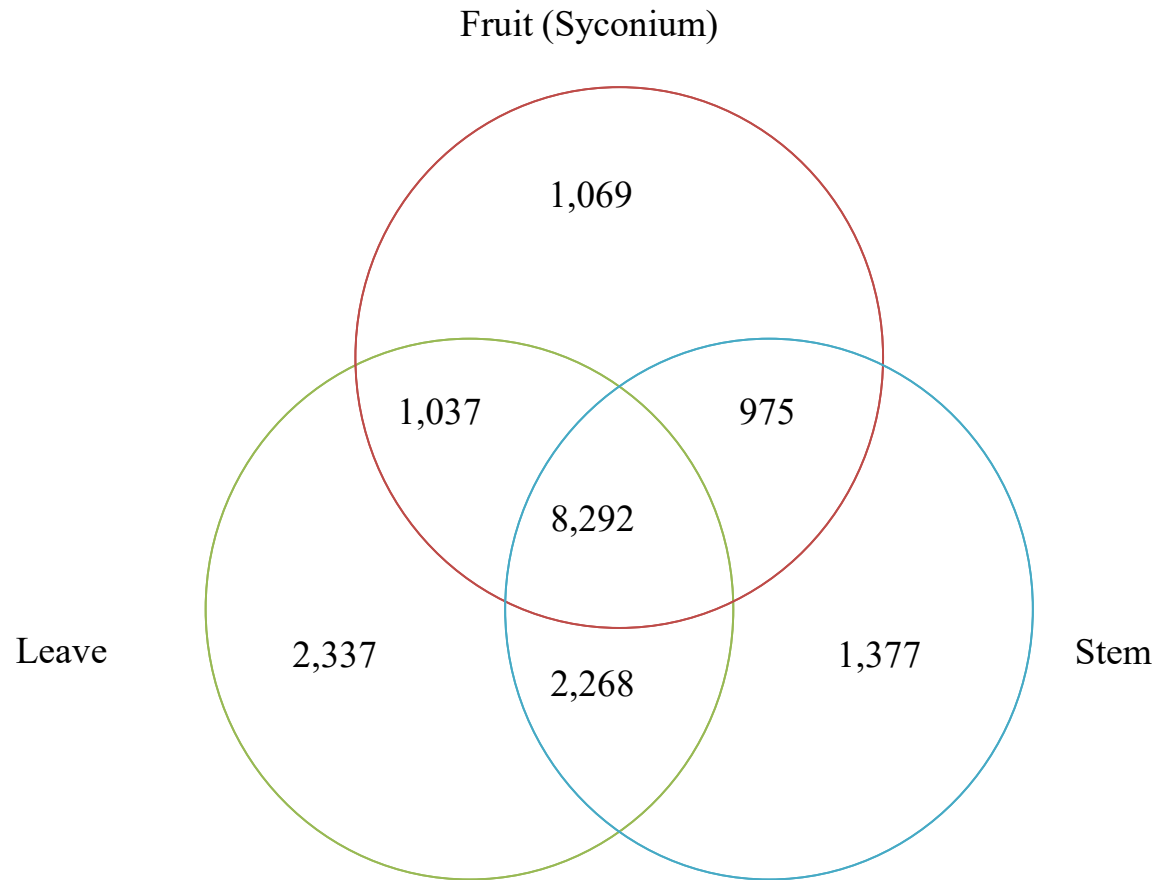

**Supplementary Figure S3.** Organ-specific gene expression. Venn diagram of expressed genes in three types of organs (Fruit, Leaf, Stem). 454 RNA-seq reads from each organ were mapped to reference fig genome and gene expression was estimated digitally.

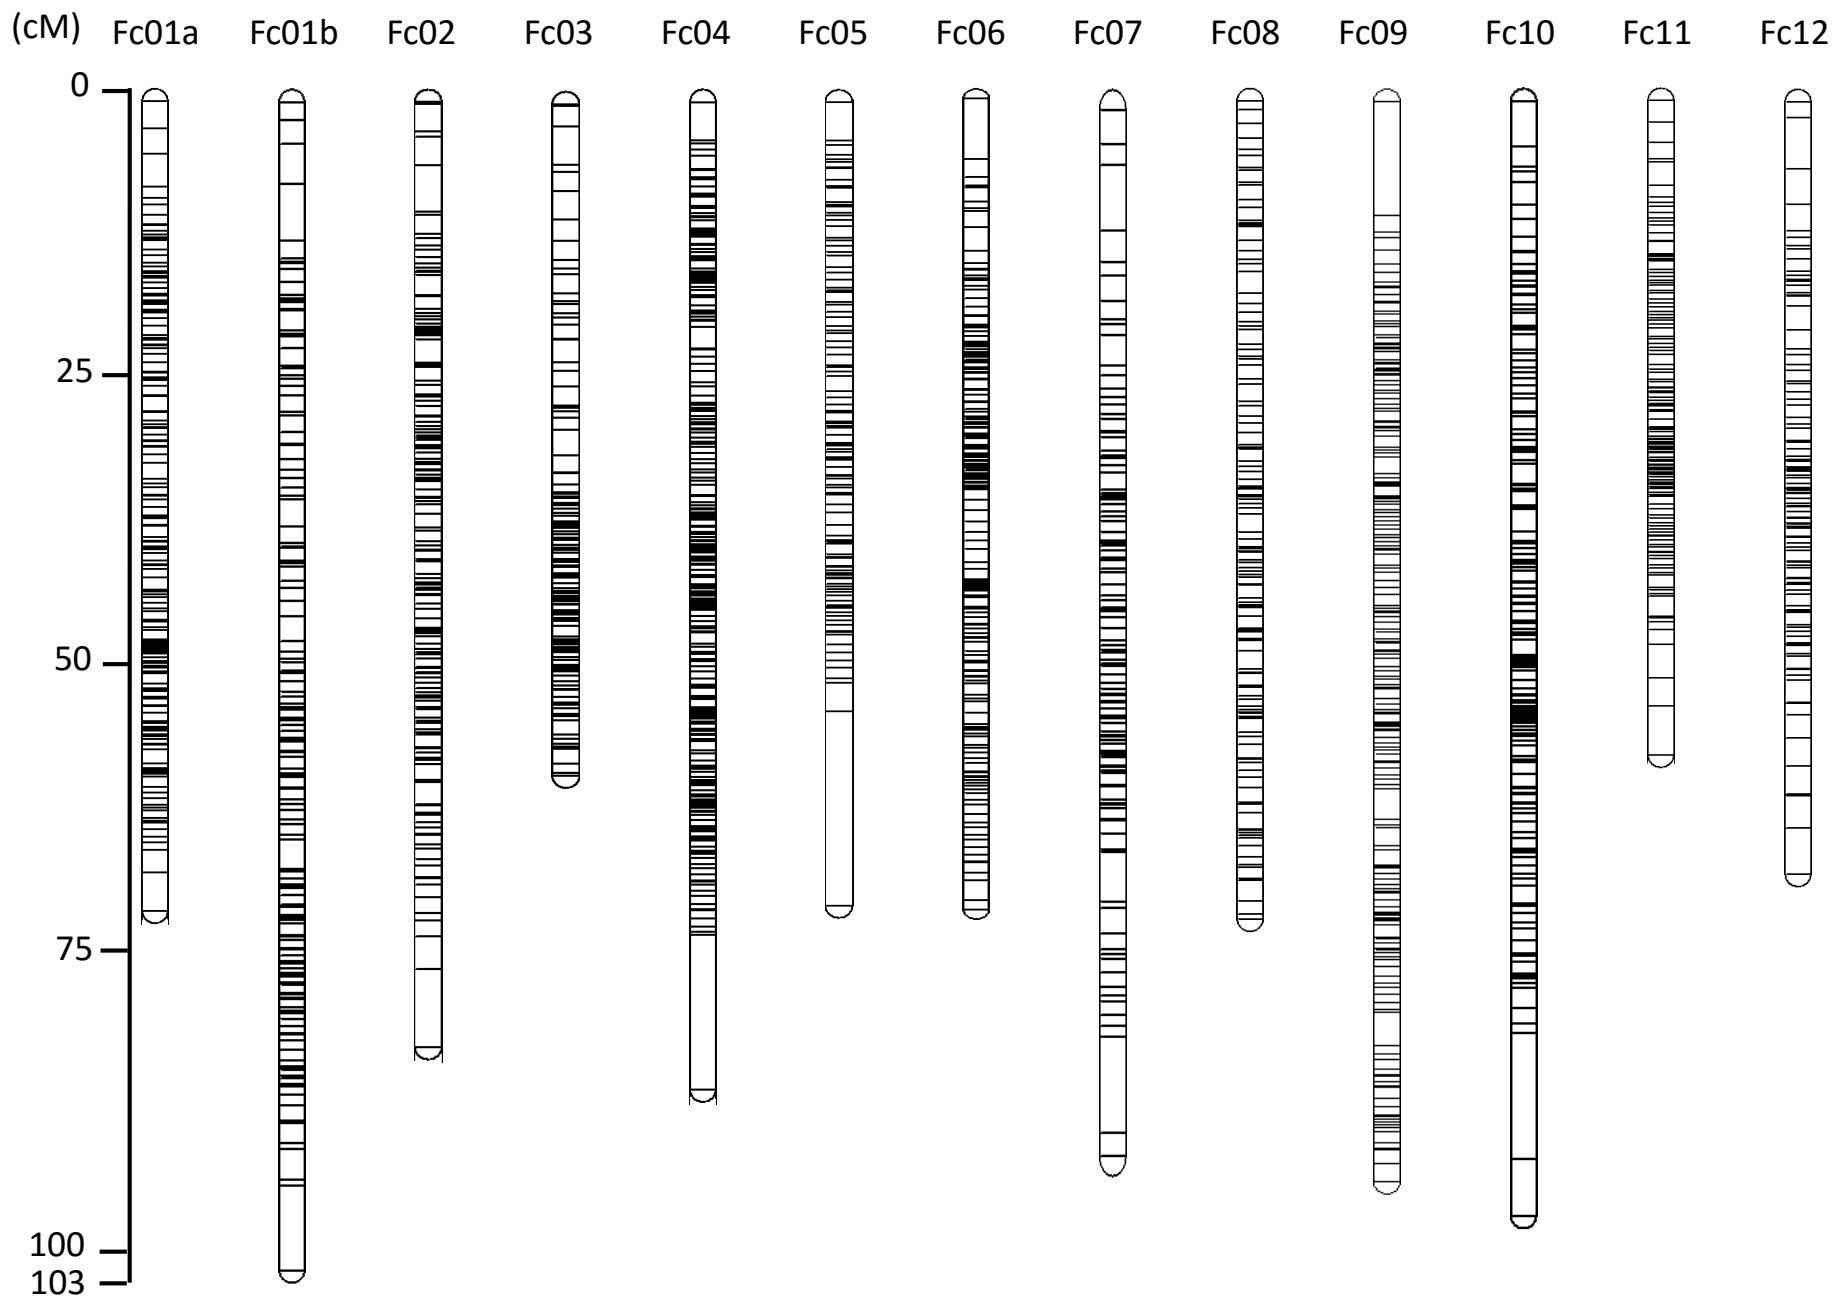

**Supplementary Figure S4.** The consensus genetic linkage map of the 13 chromosomes of *Ficus carica* L. We constructed of the genetic map with SSRs and SNP markers by JoinMap 4.

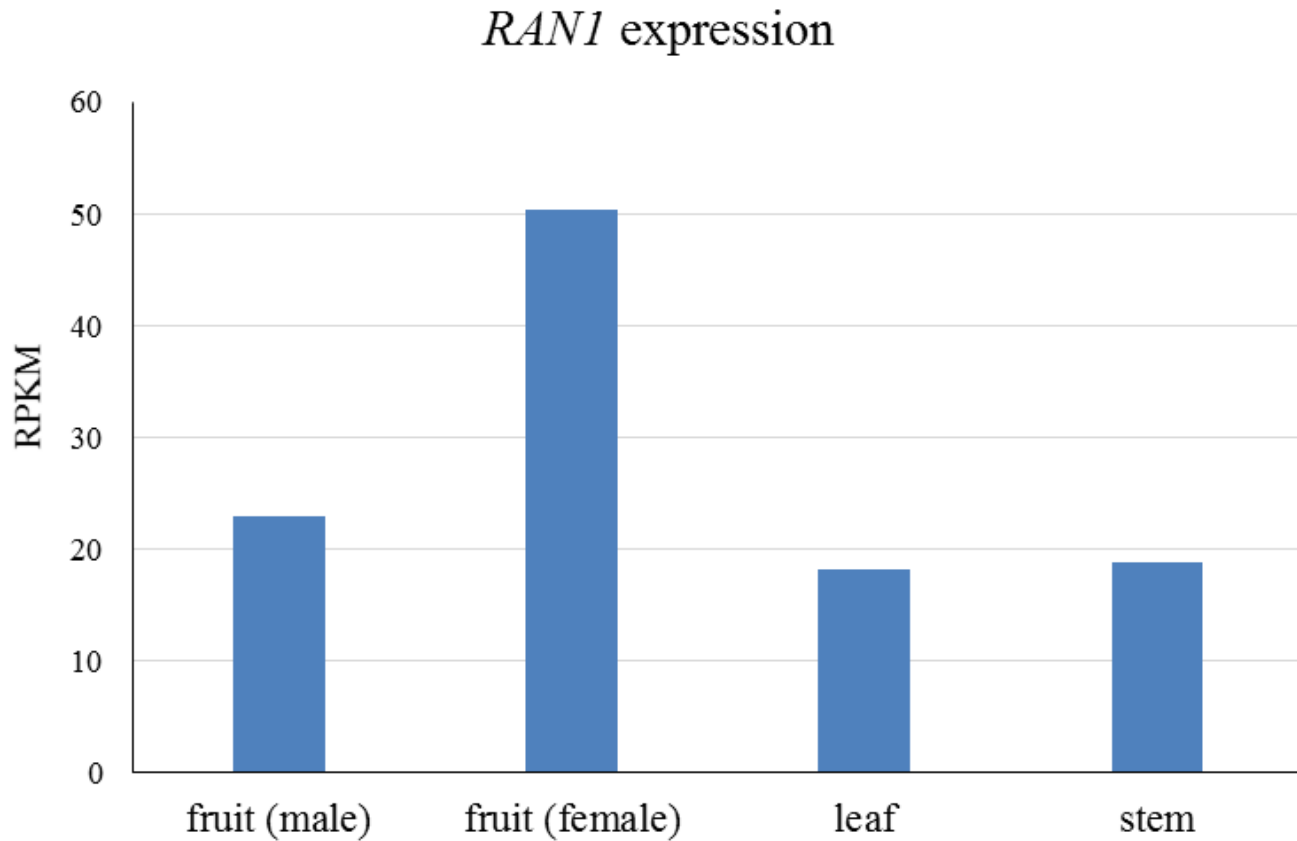

**Supplementary Figure S5.** Comparison of expression levels (measured as RPKM) for *RAN1* in fruit (from male and female), leaf and stem of fig.

# *Pcil* – 1

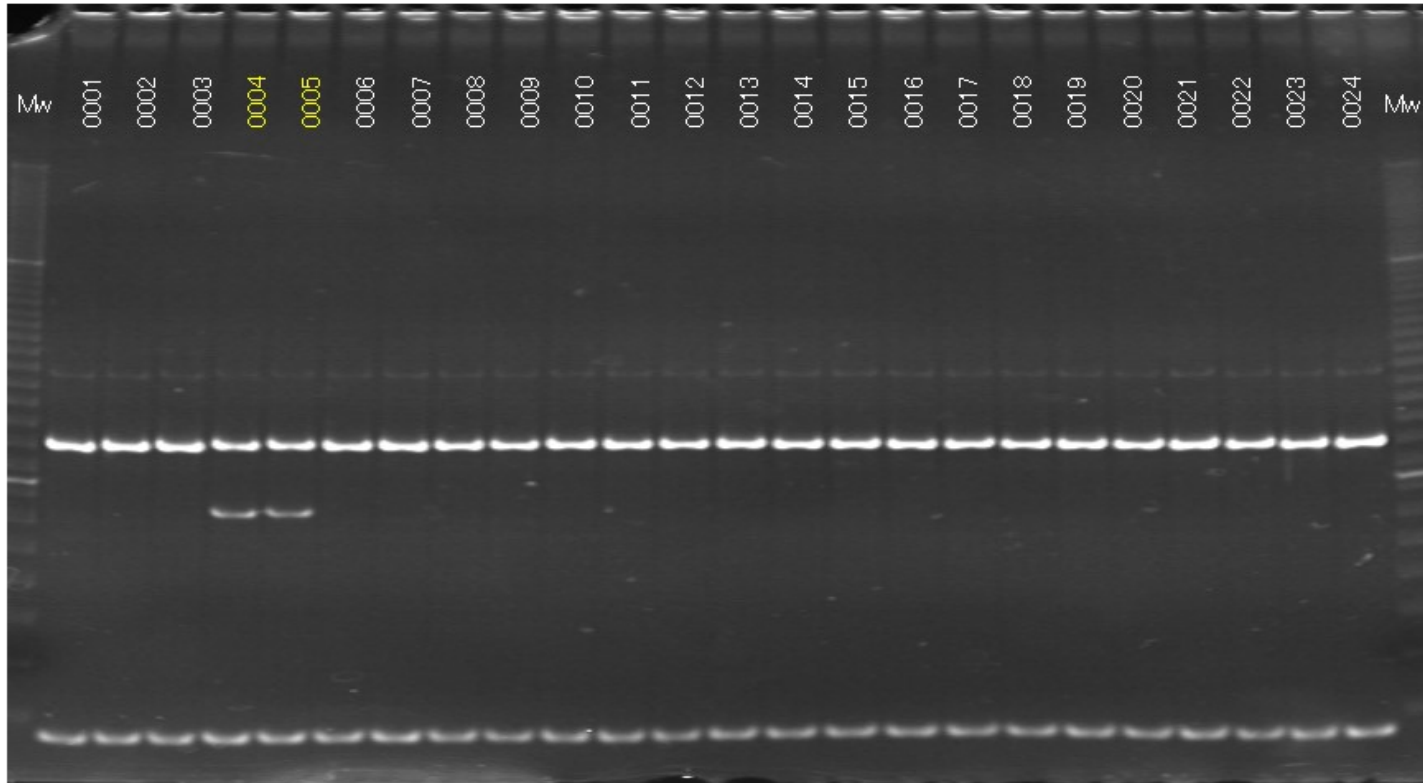

**Supplementary Figure S6.** CAPS marker analysis of 122 individuals detecting three alleles (CAT, CGT and TGT) using developed PCR primers. The band patterns with digested fragment are completely associated with male phenotypes.

# *Pcil* – 2

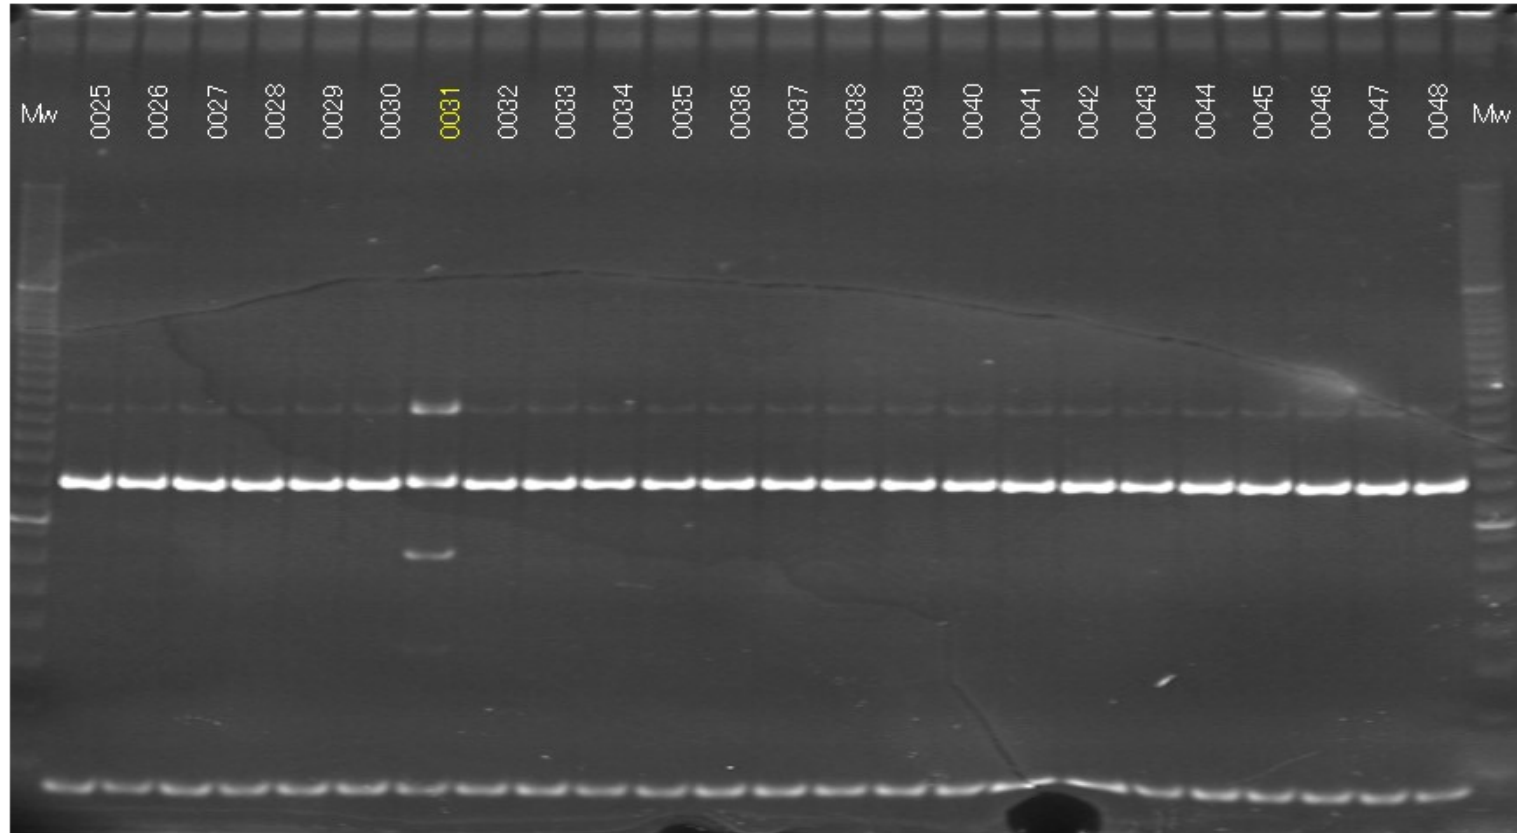

**Supplementary Figure S6.** CAPS marker analysis of 122 individuals detecting three alleles (CAT, CGT and TGT) using developed PCR primers. (Continued)



# *Pcil* – 3

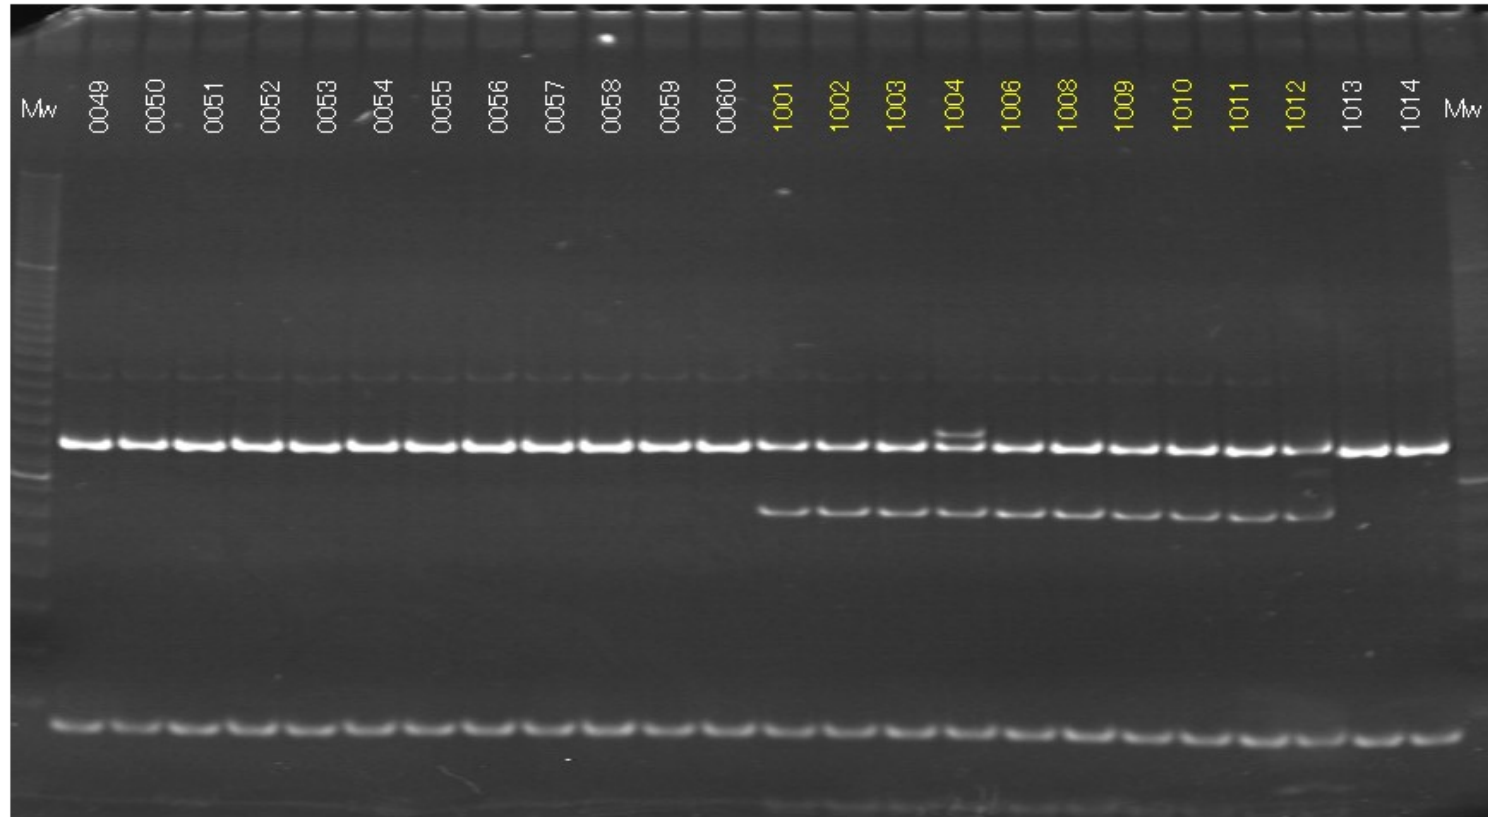

**Supplementary Figure S6.** CAPS marker analysis of 122 individuals detecting three alleles (CAT, CGT and TGT) using developed PCR primers. (Continued)

# *Pcil* – 4

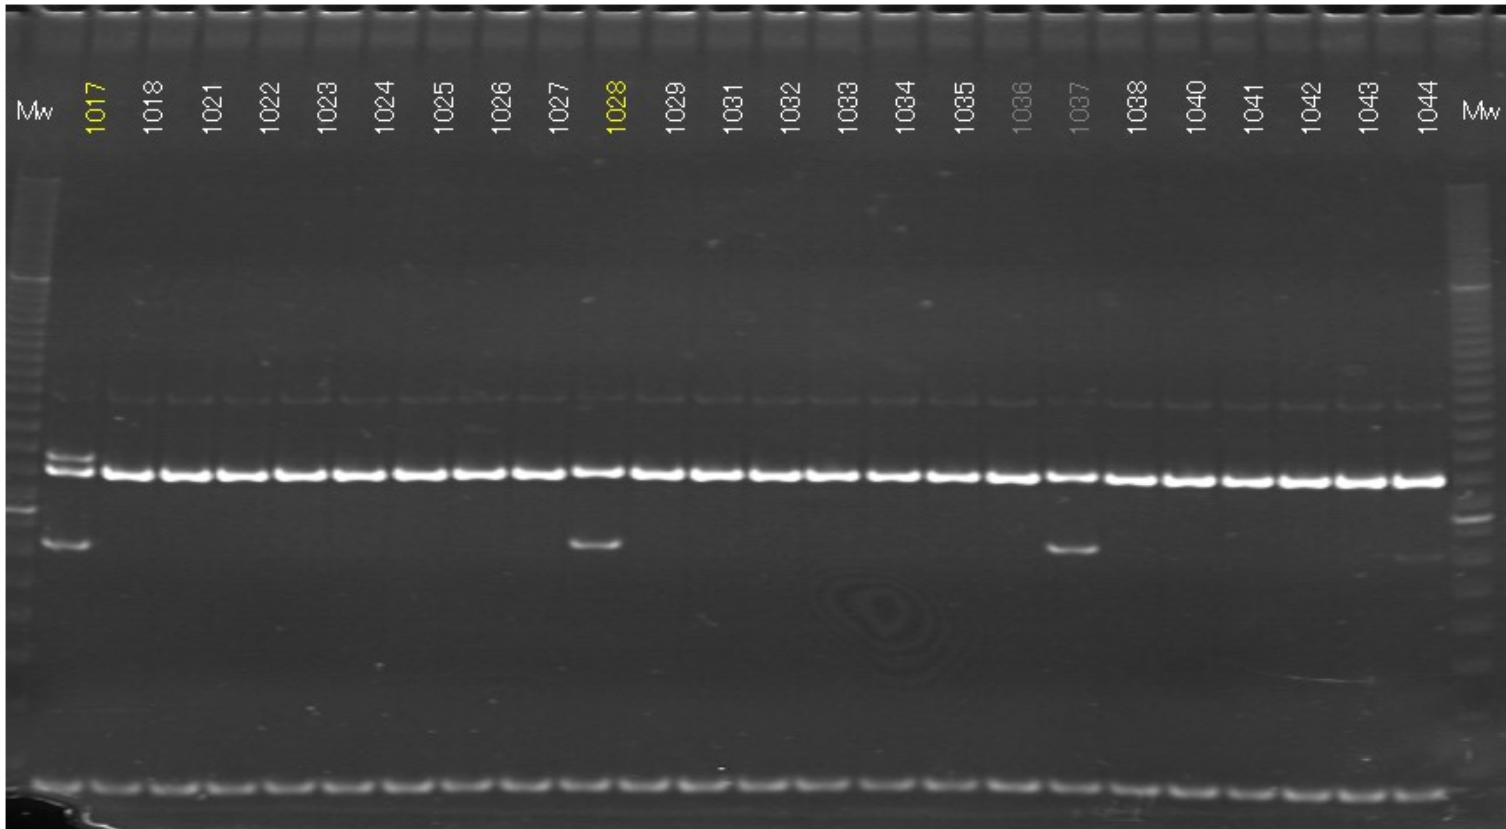

**Supplementary Figure S6.** CAPS marker analysis of 122 individuals detecting three alleles (CAT, CGT and TGT) using developed PCR primers. (Continued)

# *Pcil* – 5

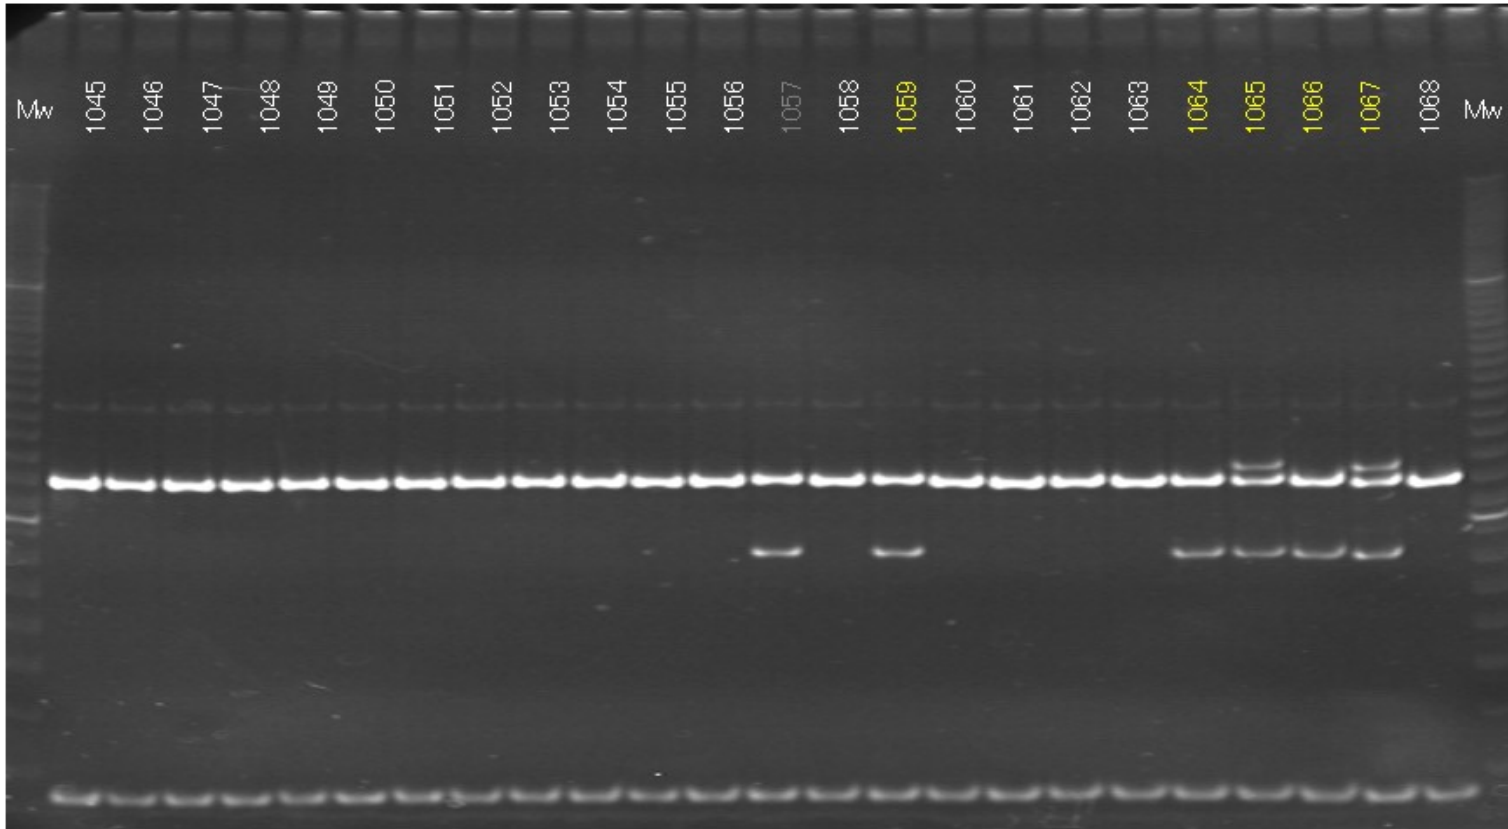

**Supplementary Figure S6.** CAPS marker analysis of 122 individuals detecting three alleles (CAT, CGT and TGT) using developed PCR primers. (Continued)

# *Pcil* – 6

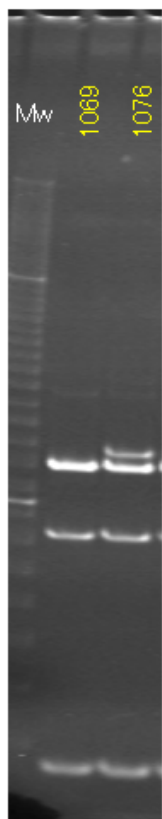

**Supplementary Figure S6.** CAPS marker analysis of 122 individuals detecting three alleles (CAT, CGT and TGT) using developed PCR primers. (Continued)

# HpyCH4IV – 1

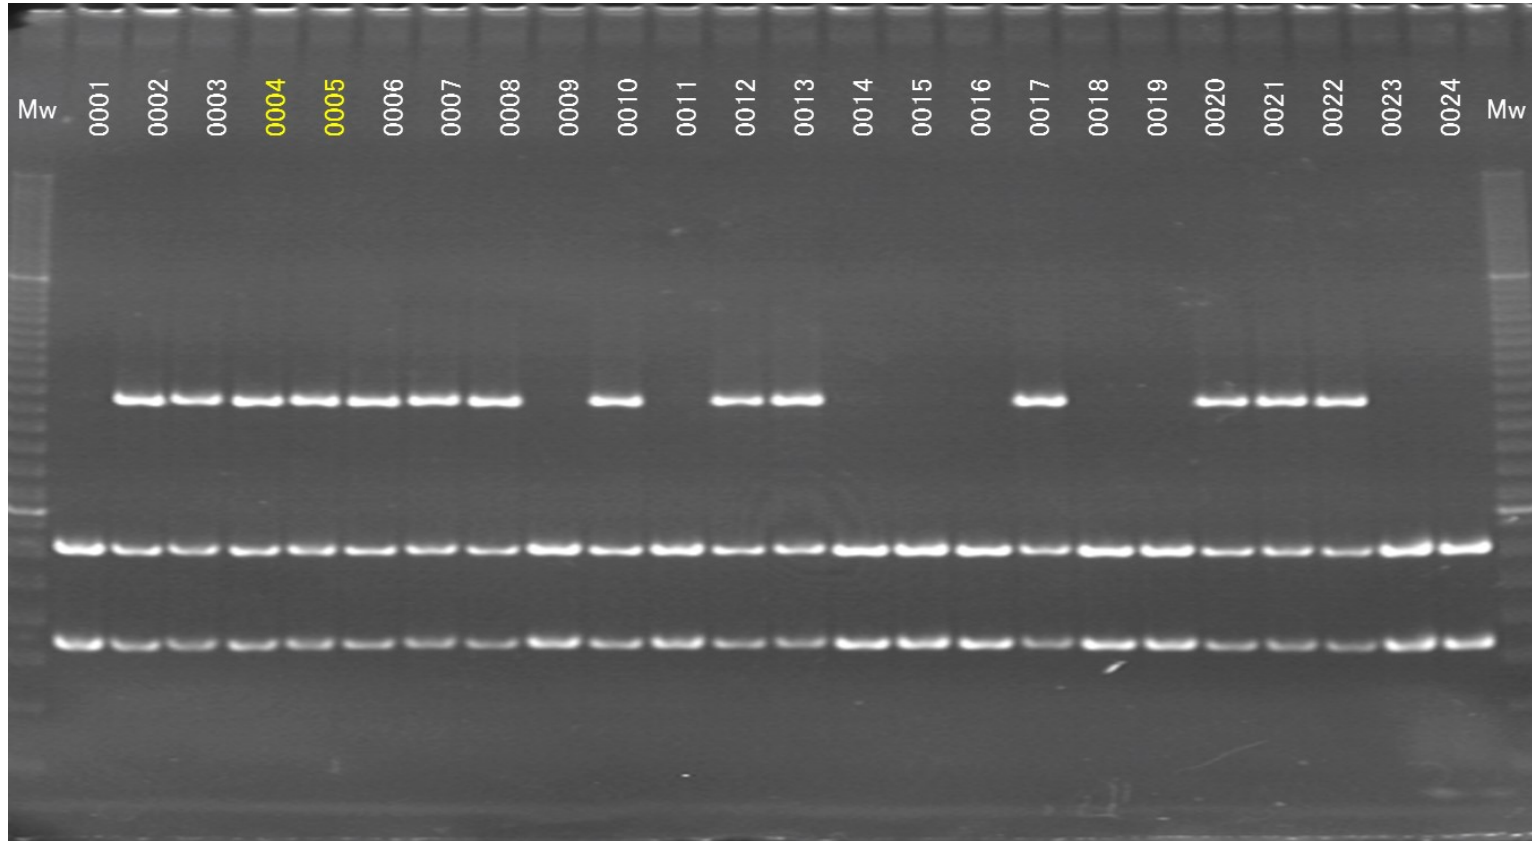

**Supplementary Figure S6.** CAPS marker analysis of 122 individuals detecting three alleles (CAT, CGT and TGT) using developed PCR primers. (Continued)

# HpyCH4IV – 2

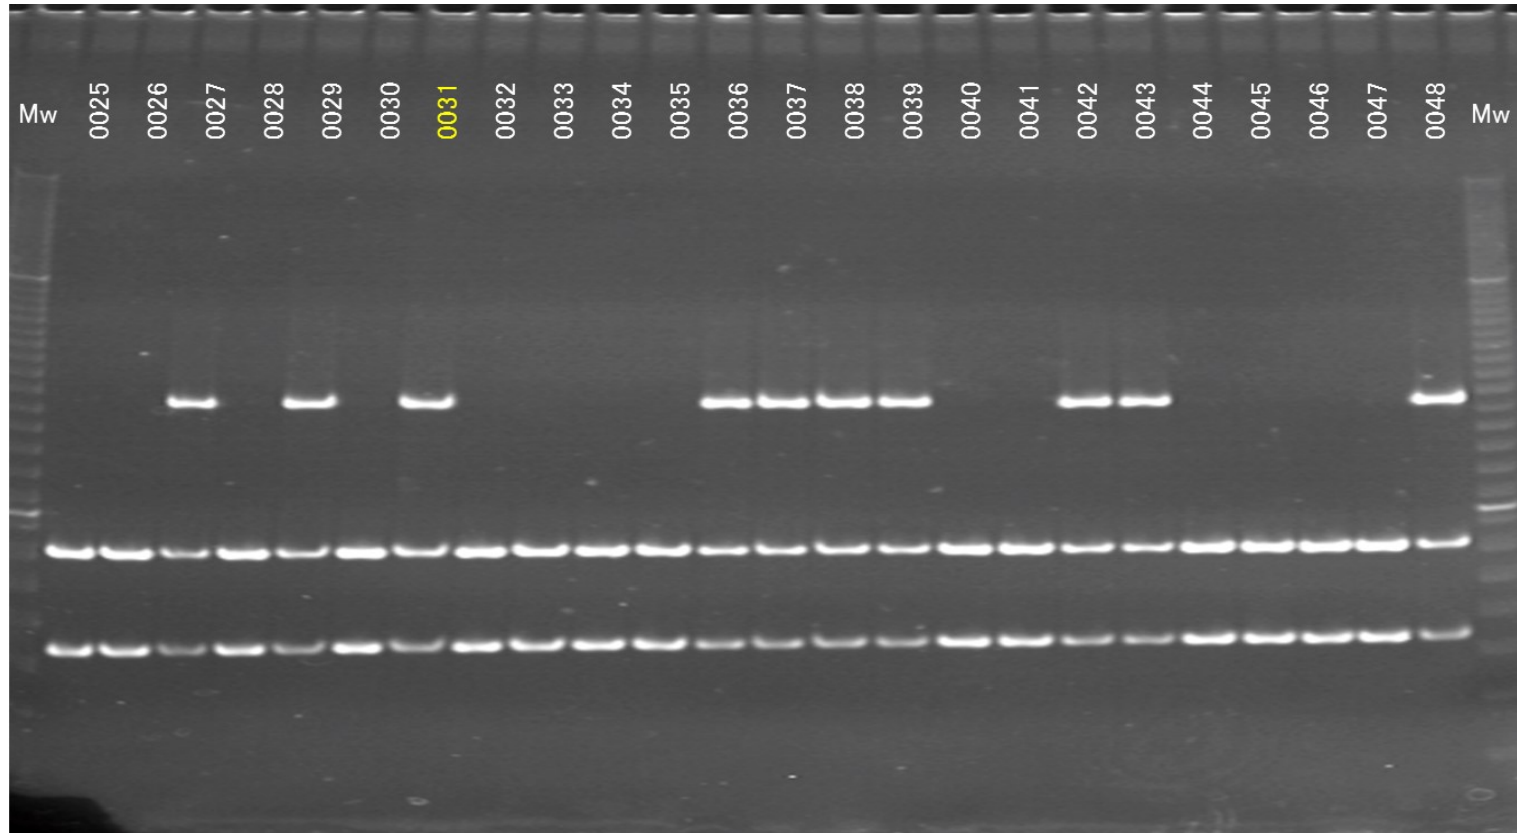

**Supplementary Figure S6.** CAPS marker analysis of 122 individuals detecting three alleles (CAT, CGT and TGT) using developed PCR primers. (Continued)

# HpyCH4IV – 3

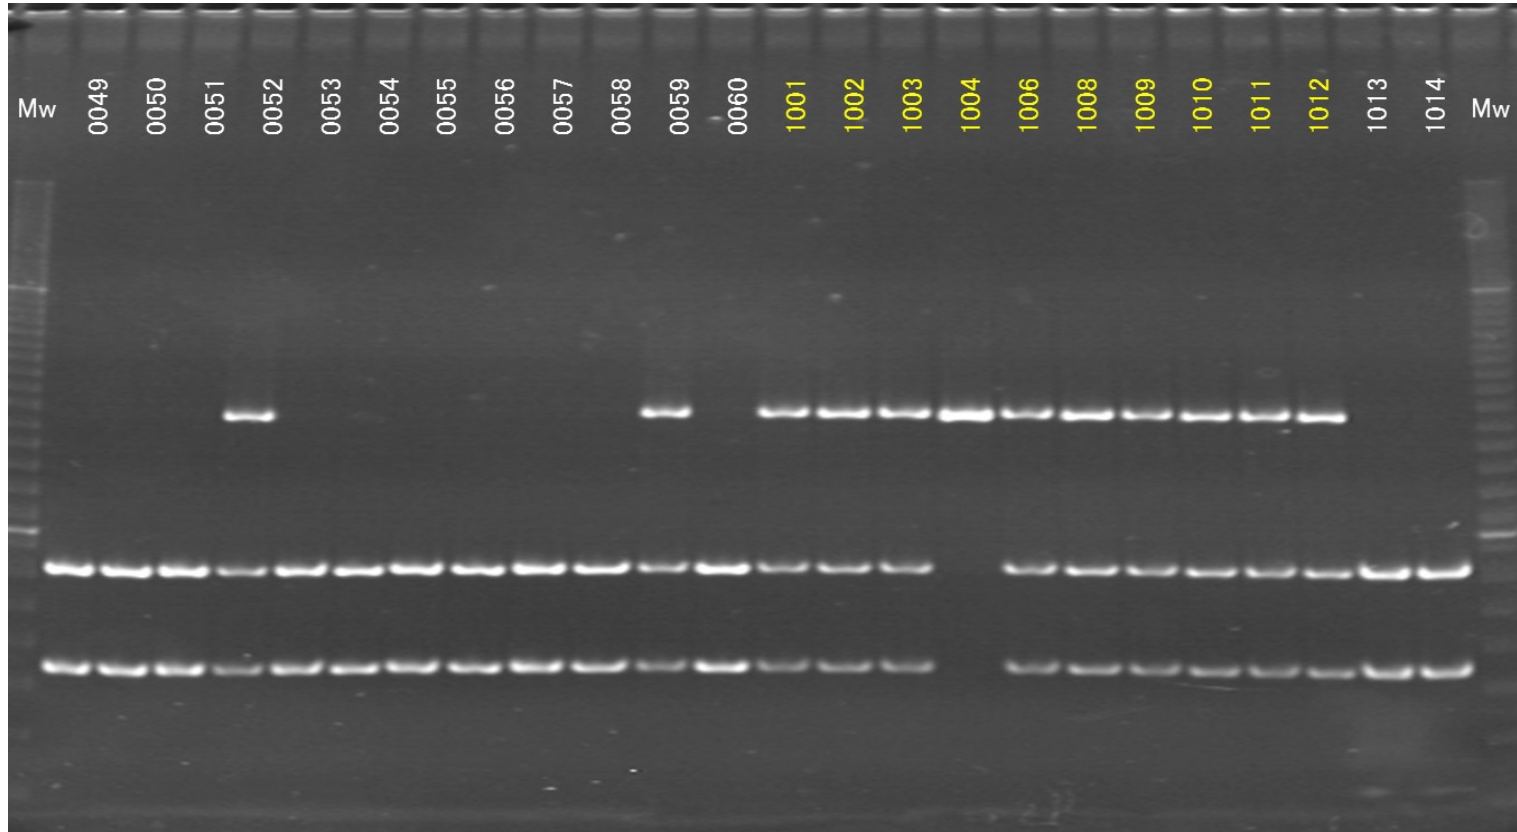

**Supplementary Figure S6.** CAPS marker analysis of 122 individuals detecting three alleles (CAT, CGT and TGT) using developed PCR primers. (Continued)

# HpyCH4IV – 4

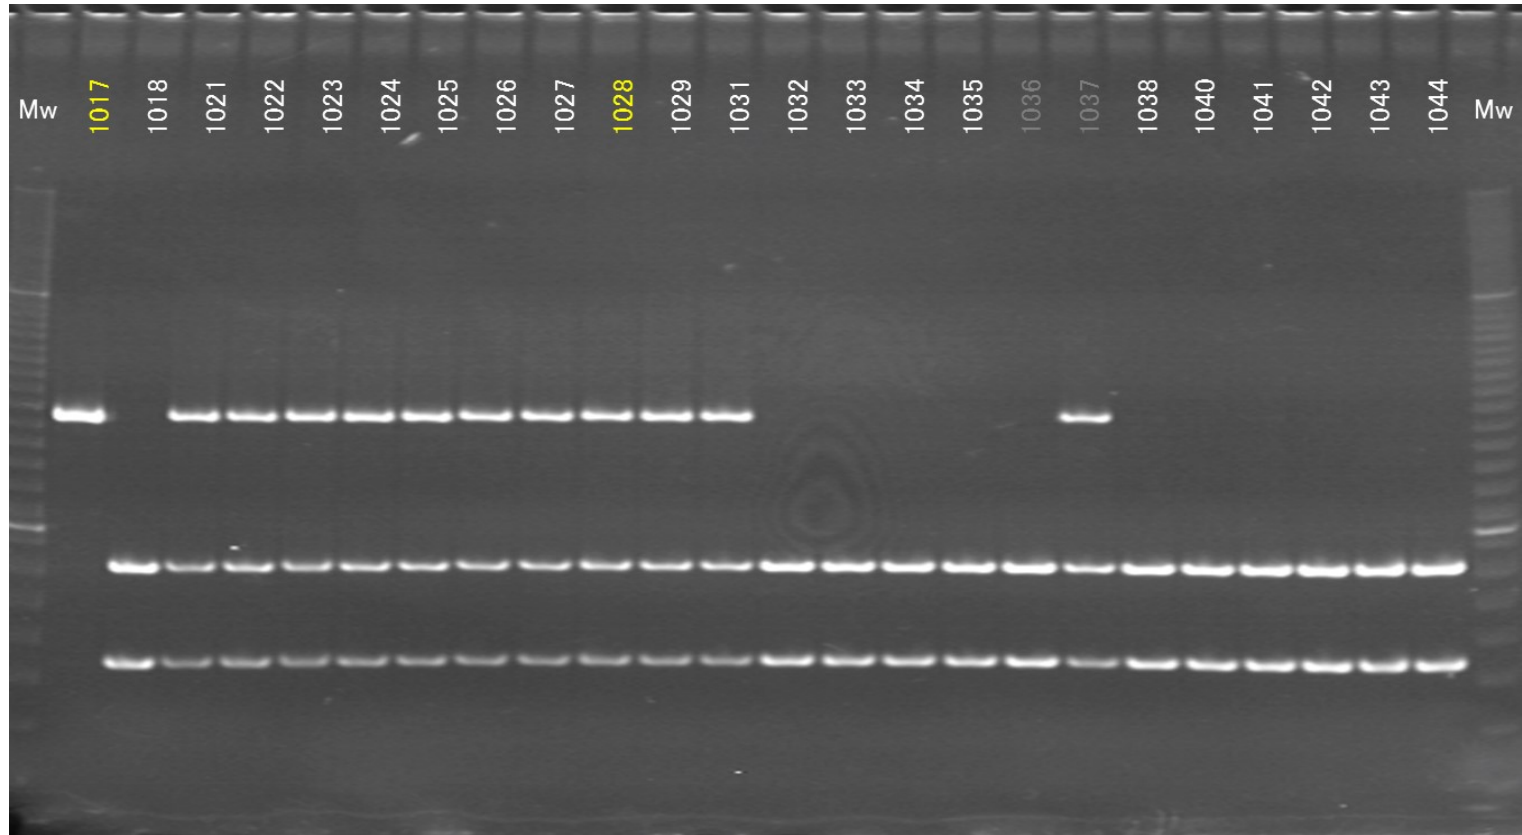

**Supplementary Figure S6.** CAPS marker analysis of 122 individuals detecting three alleles (CAT, CGT and TGT) using developed PCR primers. (Continued)



# HpyCH4IV – 5

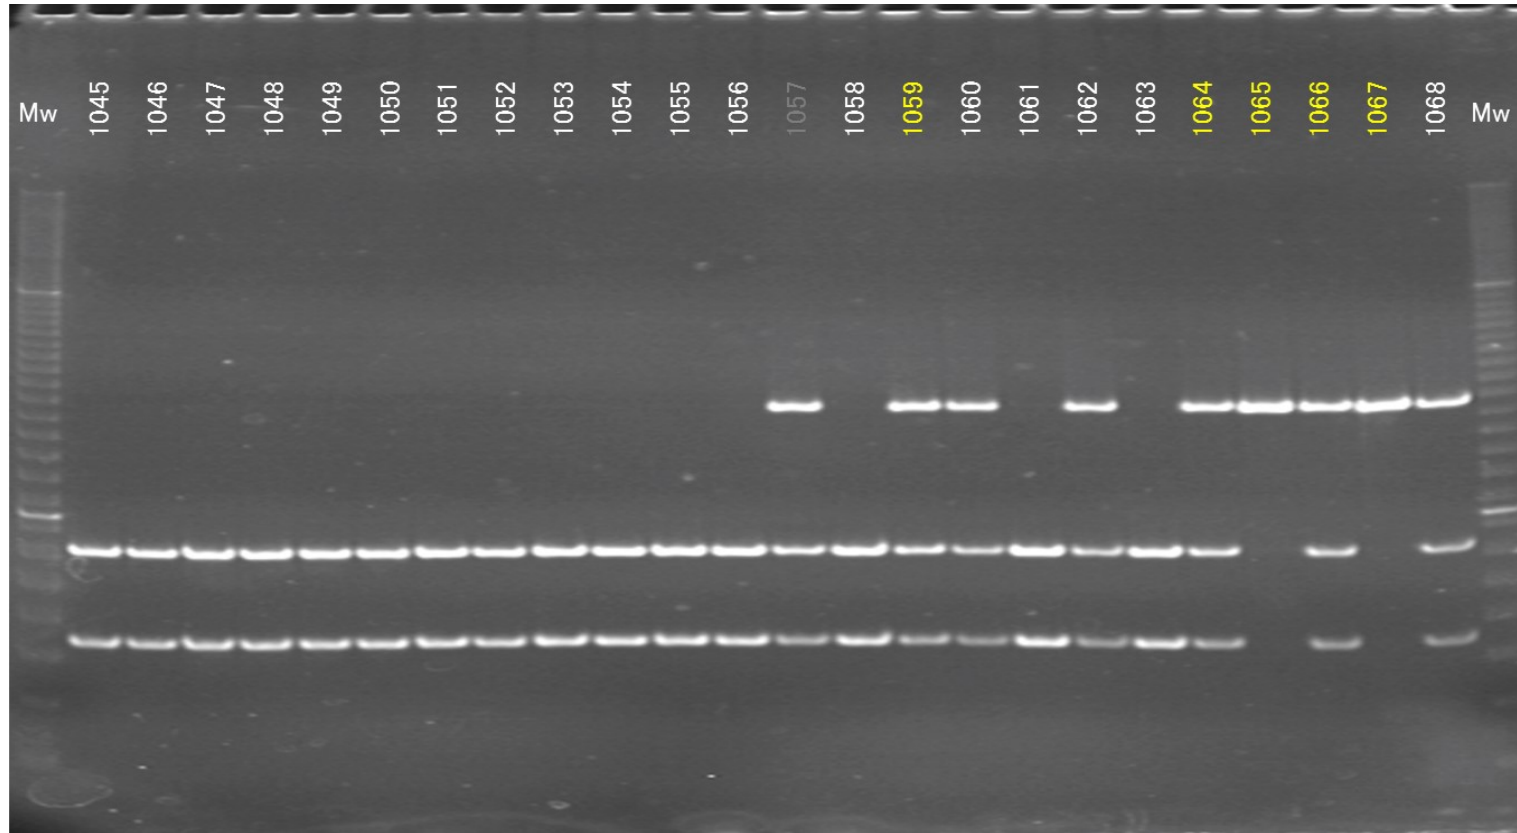

**Supplementary Figure S6.** CAPS marker analysis of 122 individuals detecting three alleles (CAT, CGT and TGT) using developed PCR primers. (Continued)

# HpyCH4IV – 6

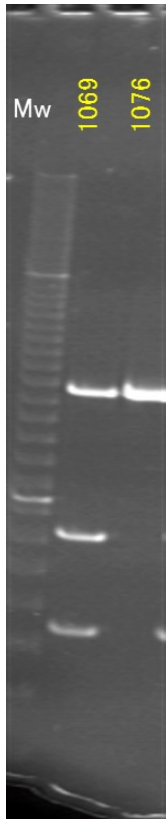

**Supplementary Figure S6.** CAPS marker analysis of 122 individuals detecting three alleles (CAT, CGT and TGT) using developed PCR primers. (Continued)

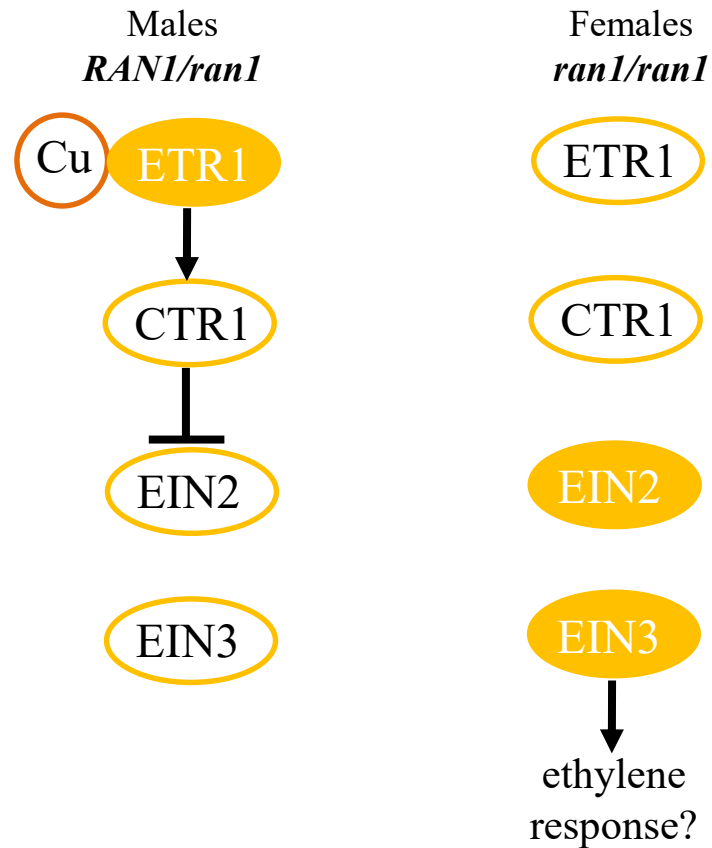

**Supplementary Figure S7.** The hypothesis of the relationship between *RAN1* genotypes and ethylene responses. In males, the receptors are active through the incorporation of copper ions and function negatively regulate downstream signaling pathway components, preventing hormone response phenotypes. By contrast, the receptors are nonfunctional due to reduced copper transport, resulting in an activated ethylene signaling pathway in females.

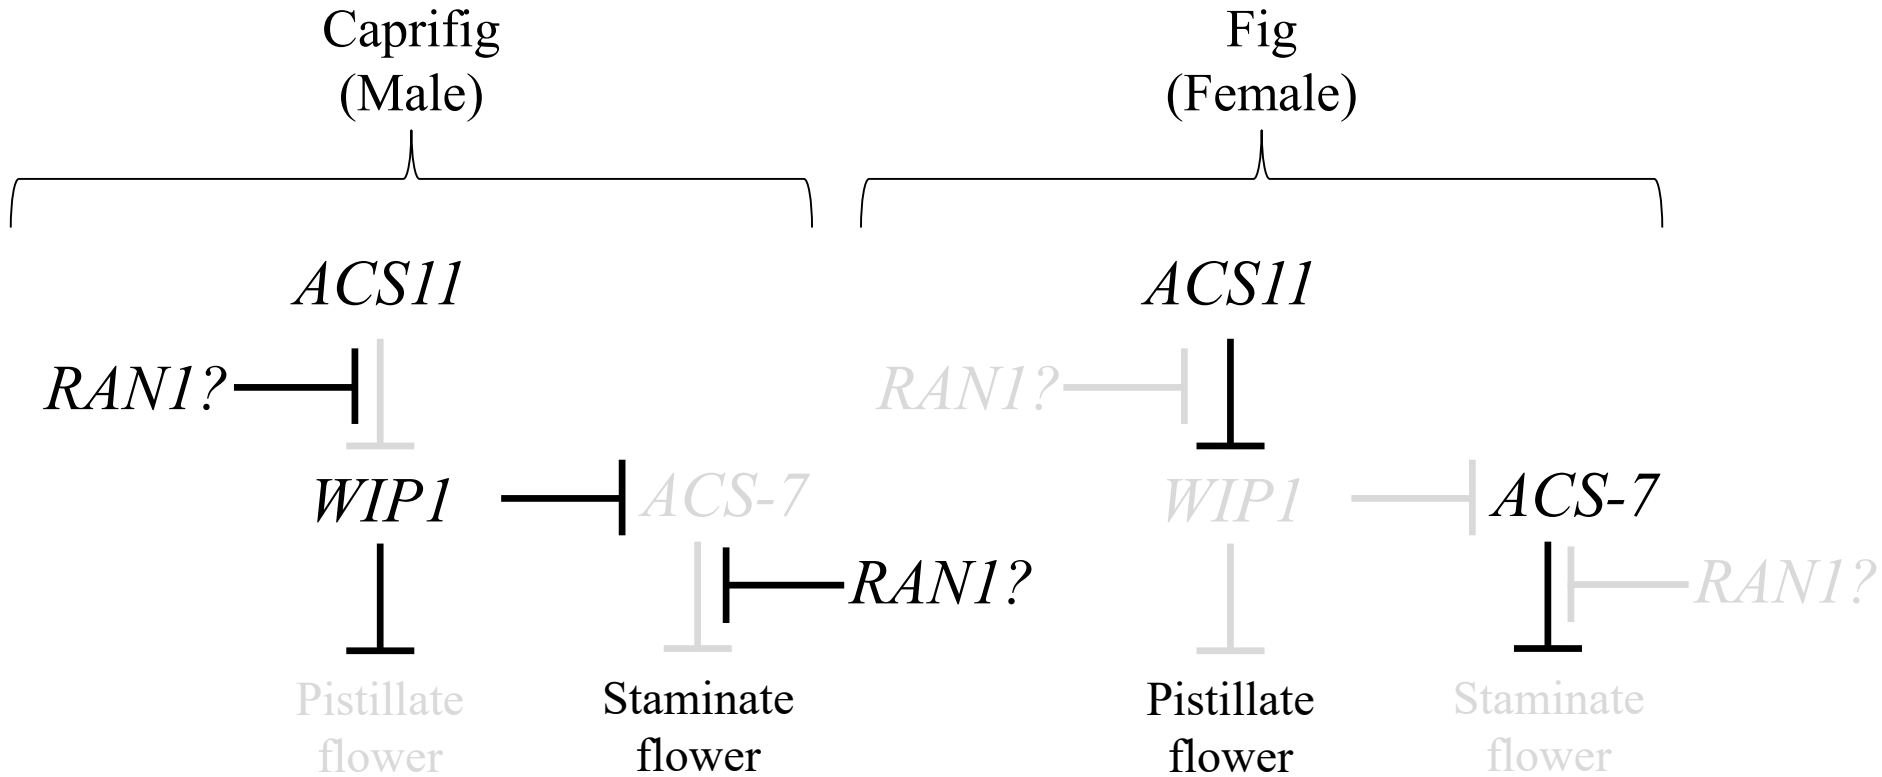

**Supplementary Figure S8.** A genetic and functional model of the fig sex determination integrating *ACS11*, *WIP1*, *ACS7* and *RANI*. *RANI* can neutralize the function of *ACS* genes through reduced ethylene sensitivity.

**Supplementary Table S1.** Summary of NGS sequencing for *F. carica* genome

| NGS sequencers                  | Library type  | Read length (bp) | Total length (bp) |
|---------------------------------|---------------|------------------|-------------------|
| Genome Analyzer II x (Illumina) | Pair end      | 75               | 8,829,348,600     |
| MiSeq (Illumina)                | Pair end      | 250              | 7,909,926,842     |
| HiSeq 2000 (Illumina)           | Mate pair 5kb | 100              | 18,137,239,600    |
|                                 |               | sub total        | 34,876,515,042    |
|                                 |               | Total            | 34,876,515,042    |

**Supplementary Table S2.** Assessment of fig genome assemble and gene set in BUSCO notation (C:complete, F:fragmented, M:missing, n: gene number)

| Size        | BUSCO notation assessment results |      |      |     |
|-------------|-----------------------------------|------|------|-----|
|             | C:                                | F:   | M    | n   |
| 248Mb       | 91%                               | 5.2% | 3.3% | 956 |
| 36,138genes | 90%                               | 5.1% | 4.6% | 956 |

**Supplementary Table S3.** Annotation summary of predicted genes for *F. carica*

|                   | Number | Rate (%) |
|-------------------|--------|----------|
| Gene Models Total | 36,138 | -        |
| Annotated         |        |          |
| Blast nr          | 22,250 | 61.6     |
| InterPro          | 20,679 | 57.2     |
| GO                | 17,432 | 48.2     |
| KAAS K            | 6,288  | 17.4     |
| KAAS EC           | 2,810  | 7.8      |
| KAAS pathway      | 3,846  | 10.6     |
| Unannotated       | 11,127 | 30.8     |

**Supplementary Table S4.** Repeat content in the *F. carica* draft genome.

|                             | Classification       | Copy Number | Length (bp) | DNA Content (%) |
|-----------------------------|----------------------|-------------|-------------|-----------------|
| Retroelements               | SINEs:               | 2           | 140         | 0.00            |
|                             | LINEs:               | 199         | 52,099      | 0.02            |
|                             | LTR elements         | 4,379       | 2,789,729   | 1.13            |
|                             | Ty1/Copia            | 2,276       | 1,335,055   | 0.54            |
|                             | Gypsy/DIRS1          | 2,100       | 1,454,478   | 0.59            |
|                             | Others               | 3           | 196         | 0.00            |
|                             | Retroelements total  | 4,580       | 2,841,968   | 1.15            |
| DNA transposons             | hobo-Activator       | 88          | 19,431      | 0.01            |
|                             | Tc1-IS630-Pogo       | 79          | 14,798      | 0.01            |
|                             | En-Spm               | 11          | 5,963       | 0.00            |
|                             | Tourist/Harbinger    | 23          | 6,781       | 0.00            |
|                             | Others               | 973         | 172,298     | 0.07            |
|                             | DNA transposon total | 1,174       | 219,271     | 0.09            |
| Unclassified elements       |                      | 222,067     | 36,710,264  | 14.86           |
| Transposable elements Total |                      | 227,821     | 39,771,503  | 16.10           |
| Satellite                   |                      | 1           | 129         | 0.00            |
| Simple repeat               |                      | 260,203     | 9,553,761   | 3.87            |
| Low complexity              |                      | 46,904      | 2,378,715   | 0.96            |
| Total                       |                      | 534,929     | 51,704,108  | 20.93           |



**Supplementary Table S5.** Preliminary restriction enzyme experiments for RAD-seq using F1 population (Horaishi × Caprifig 6085).

| Parent   |               | Restriction enzyme site |                |
|----------|---------------|-------------------------|----------------|
| Horaishi | Caprifig 6085 | PstI-EcoRI (PE)         | PstI-MspI (PM) |
| REF      | Het           | 4,011                   | 4,243          |
| Het      | REF           | 2,133                   | 2,193          |
| Het      | Het           | 2,203                   | 2,701          |
| Het      | ALT           | 2,006                   | 2,020          |
| ALT      | Het           | 103                     | 106            |

## Supplementary Table S6. The RAD-seq alignment results of 52 plants for genetic linkage map construction.

| name            | input       | pair aligned | single aligned | total aligned | alignment rate |
|-----------------|-------------|--------------|----------------|---------------|----------------|
| HO-PM           | 1995800     | 1019340      | 262485         | 1281825       | 64.23%         |
| caprifig6058-PM | 1787950     | 773138       | 216039         | 989177        | 55.32%         |
| HOcaprifigF1-01 | 4832442     | 3099892      | 356566         | 3456458       | 71.53%         |
| HOcaprifigF1-02 | 4510730     | 2804244      | 394220         | 3198464       | 70.91%         |
| HOcaprifigF1-03 | 5373047     | 3277444      | 449159         | 3726603       | 69.36%         |
| HOcaprifigF1-04 | 4265030     | 2695652      | 356995         | 3052647       | 71.57%         |
| HOcaprifigF1-05 | 3892605     | 2267306      | 350816         | 2618122       | 67.26%         |
| HOcaprifigF1-06 | 4752380     | 2992792      | 383734         | 3376526       | 71.05%         |
| HOcaprifigF1-07 | 4288142     | 2901870      | 308034         | 3209904       | 74.86%         |
| HOcaprifigF1-08 | 4907463     | 2980580      | 390311         | 3370891       | 68.69%         |
| HOcaprifigF1-09 | 5006757     | 3043624      | 416819         | 3460443       | 69.12%         |
| HOcaprifigF1-10 | 5331994     | 3224002      | 444974         | 3668976       | 68.81%         |
| HOcaprifigF1-11 | 6080926     | 3827216      | 490545         | 4317761       | 71.00%         |
| HOcaprifigF1-12 | 5236580     | 2996154      | 442207         | 3438361       | 65.66%         |
| HOcaprifigF1-13 | 4431024     | 2809618      | 364152         | 3173770       | 71.63%         |
| HOcaprifigF1-14 | 5163006     | 3185322      | 433456         | 3618778       | 70.09%         |
| HOcaprifigF1-15 | 4702750     | 2735670      | 418047         | 3153717       | 67.06%         |
| HOcaprifigF1-16 | 5035519     | 3166976      | 405625         | 3572601       | 70.95%         |
| HOcaprifigF1-17 | 5879291     | 3565596      | 505396         | 4070992       | 69.24%         |
| HOcaprifigF1-18 | 5296004     | 3190256      | 471496         | 3661752       | 69.14%         |
| HOcaprifigF1-19 | 6105990     | 3526148      | 541885         | 4068033       | 66.62%         |
| HOcaprifigF1-20 | 5072234     | 2765894      | 494227         | 3260121       | 64.27%         |
| HOcaprifigF1-21 | 4588422     | 2805196      | 392621         | 3197817       | 69.69%         |
| HOcaprifigF1-22 | 5054191     | 2988198      | 440681         | 3428879       | 67.84%         |
| HOcaprifigF1-23 | 4723768     | 2935082      | 399533         | 3334615       | 70.59%         |
| HOcaprifigF1-24 | 4562430     | 2795856      | 384000         | 3179856       | 69.70%         |
| HOcaprifigF1-25 | 5545001     | 3078212      | 474817         | 3553029       | 64.08%         |
| HOcaprifigF1-26 | 5983813     | 3662602      | 482385         | 4144987       | 69.27%         |
| HOcaprifigF1-27 | 5874316     | 3608370      | 482870         | 4091240       | 69.65%         |
| HOcaprifigF1-28 | 5328310     | 3139906      | 477633         | 3617539       | 67.89%         |
| HOcaprifigF1-29 | 4589603     | 2822676      | 370978         | 3193654       | 69.58%         |
| HOcaprifigF1-30 | 5224541     | 2929940      | 427557         | 3357497       | 64.26%         |
| HOcaprifigF1-31 | 4719220     | 2522610      | 438442         | 2961052       | 62.74%         |
| HOcaprifigF1-32 | 4632692     | 2714068      | 404136         | 3118204       | 67.31%         |
| HOcaprifigF1-33 | 6420556     | 3760010      | 525156         | 4285166       | 66.74%         |
| HOcaprifigF1-34 | 5899329     | 3551726      | 504598         | 4056324       | 68.76%         |
| HOcaprifigF1-35 | 5996619     | 3528728      | 520740         | 4049468       | 67.53%         |
| HOcaprifigF1-36 | 5429684     | 3283802      | 475258         | 3759060       | 69.23%         |
| HOcaprifigF1-37 | 4754185     | 2821646      | 410583         | 3232229       | 67.99%         |
| HOcaprifigF1-38 | 5437888     | 3190368      | 489191         | 3679559       | 67.67%         |
| HOcaprifigF1-39 | 5099334     | 2987092      | 440251         | 3427343       | 67.21%         |
| HOcaprifigF1-40 | 5077754     | 2851248      | 451335         | 3302583       | 65.04%         |
| HOcaprifigF1-41 | 5934718     | 3350168      | 502065         | 3852233       | 64.91%         |
| HOcaprifigF1-42 | 6212100     | 3734682      | 531727         | 4266409       | 68.68%         |
| HOcaprifigF1-43 | 6682105     | 3995908      | 571782         | 4567690       | 68.36%         |
| HOcaprifigF1-44 | 6135807     | 3516020      | 537748         | 4053768       | 66.07%         |
| HOcaprifigF1-45 | 4976907     | 3049024      | 428708         | 3477732       | 69.88%         |
| HOcaprifigF1-46 | 5976080     | 3546882      | 505697         | 4052579       | 67.81%         |
| HOcaprifigF1-47 | 4260978     | 2382496      | 240598         | 2623094       | 61.56%         |
| HOcaprifigF1-48 | 4137974     | 2713496      | 298017         | 3011513       | 72.78%         |
| HOcaprifigF1-49 | 6519731     | 4355458      | 452797         | 4808255       | 73.75%         |
| HOcaprifigF1-50 | 6016513     | 3803954      | 481560         | 4285514       | 71.23%         |
| HOcaprifigF1-51 | 7059406     | 4662060      | 502180         | 5164240       | 73.15%         |
| HOcaprifigF1-52 | 6180914     | 3881750      | 496595         | 4378345       | 70.84%         |
| Total           | 278,982,553 | 167,817,968  | 23,439,427     | 191,257,395   |                |
| Average         | 5,365,049   | 3,227,269    | 450,758        | 3,678,027     | 68.34%         |

**Supplementary Table S7.** Summary of genetic linkage map construction by RAD-seq in *F. carica*.

| Group   | Horaishi (Seed parent) |            | Caprifig6085 (pollen parent) |            | Integration    |            | Density (cM) |
|---------|------------------------|------------|------------------------------|------------|----------------|------------|--------------|
|         | Number of Loci         | Length(cM) | Number of Loci               | Length(cM) | Number of Loci | Length(cM) |              |
| Fc01a   | 404                    | 77.7       | 445                          | 82.5       | 755            | 71.9       | 0.10         |
| Fc01b   | 269                    | 98.5       | 341                          | 94.7       | 526            | 102.9      | 0.20         |
| Fc02    | 518                    | 97.9       | 435                          | 70.0       | 790            | 83.8       | 0.11         |
| Fc03    | 264                    | 83.6       | 214                          | 53.0       | 397            | 60.4       | 0.15         |
| Fc04    | 468                    | 132.7      | 615                          | 103.5      | 906            | 87.4       | 0.10         |
| Fc05    | 263                    | 61.1       | 318                          | 76.4       | 485            | 71.5       | 0.15         |
| Fc06    | 358                    | 98.7       | 334                          | 80.5       | 583            | 93.7       | 0.16         |
| Fc07    | 267                    | 81.6       | 243                          | 55.5       | 424            | 58.6       | 0.14         |
| Fc08    | 356                    | 111.4      | 192                          | 96.0       | 479            | 72.7       | 0.15         |
| Fc09    | 448                    | 99.9       | 416                          | 100.0      | 729            | 95.4       | 0.13         |
| Fc10    | 301                    | 102.3      | 351                          | 93.3       | 552            | 98.5       | 0.18         |
| Fc11    | 266                    | 70.8       | 324                          | 85.0       | 512            | 58.5       | 0.11         |
| Fc12    | 207                    | 51.1       | 226                          | 72.7       | 360            | 68.8       | 0.19         |
| Total   | 4,389                  | 1167.4     | 4,454                        | 1063.2     | 7,498          | 1,024.1    |              |
| Average | 337.6                  | 89.8       | 342.6                        | 81.8       | 576.8          | 78.8       | 0.14         |

**Supplementary Table S8.** Male associated DNA sequence (MADF) markers information and its genotyping results

| Marker name | Foward/<br>Reverse | Primer sequence             | Test population                      | No. of test<br>plants | No. of male<br>caprifigs | No. of female<br>figs | No. of accurate<br>calling | Accuracy<br>rate (%) |
|-------------|--------------------|-----------------------------|--------------------------------------|-----------------------|--------------------------|-----------------------|----------------------------|----------------------|
| MADF1       | F                  | CAGCAATCCCTGATACAAG         | F1 (Violette de Dauphine x M106-238) | 71                    | 36                       | 35                    | 69                         | 97.2                 |
|             | R                  | CAGCAATCCCATACATTATTC       | F1 (Violette de Solies x VC-180)     | 58                    | 20                       | 38                    | 56                         | 96.6                 |
|             |                    |                             | F1 (Royal Vineyard x VC-180)         | 62                    | 24                       | 38                    | 60                         | 96.8                 |
|             |                    |                             | Cultivars                            | 56                    | 7                        | 49                    | 44                         | 78.6                 |
| MADF2       | F                  | TGACGATGCAGCAAGTGAAGGGC     | F1 (Violette de Dauphine x M106-238) | 71                    | 36                       | 35                    | 71                         | 100.0                |
|             | R                  | TGACGATGCACGACATTGGTGGATG   | F1 (Violette de Solies x VC-180)     | 58                    | 20                       | 38                    | 58                         | 100.0                |
|             |                    |                             | F1 (Royal Vineyard x VC-180)         | 62                    | 24                       | 38                    | 62                         | 100.0                |
|             |                    |                             | Cultivars                            | 56                    | 7                        | 49                    | 56                         | 100.0                |
| MADF3       | F                  | CCTGGGTCATCTACATAATAACC     | F1 (Violette de Dauphine x M106-238) | 71                    | 36                       | 35                    | 71                         | 100.0                |
|             | R                  | CCTGGGTCATTATAGAAAGAACC     | F1 (Violette de Solies x VC-180)     | 58                    | 20                       | 38                    | 58                         | 100.0                |
|             |                    |                             | F1 (Royal Vineyard x VC-180)         | 62                    | 24                       | 38                    | 62                         | 100.0                |
|             |                    |                             | Cultivars                            | 56                    | 7                        | 49                    | 56                         | 100.0                |
| MADF4       | F                  | TCTCTAGGGGCAGCATGGACAGTTTTC | F1 (Violette de Dauphine x M106-238) | 71                    | 36                       | 35                    | 71                         | 100.0                |
|             | R                  | TCTCTAGGGGGGGGGCGGATTTTTTG  | F1 (Violette de Solies x VC-180)     | 58                    | 20                       | 38                    | 58                         | 100.0                |
|             |                    |                             | F1 (Royal Vineyard x VC-180)         | 62                    | 24                       | 38                    | 62                         | 100.0                |
|             |                    |                             | Cultivars                            | 56                    | 7                        | 49                    | 56                         | 100.0                |
| MADF5       | F                  | GATCTAACCGAACTAGAAATGG      | F1 (Violette de Dauphine x M106-238) | 71                    | 36                       | 35                    | 71                         | 100.0                |
|             | R                  | GATCTAACCGAAAACAAATGTC      | F1 (Violette de Solies x VC-180)     | 58                    | 20                       | 38                    | 58                         | 100.0                |
|             |                    |                             | F1 (Royal Vineyard x VC-180)         | 62                    | 24                       | 38                    | 62                         | 100.0                |
|             |                    |                             | Cultivars                            | 56                    | 7                        | 49                    | 56                         | 100.0                |
| MADF6       | F                  | ACACTCGGCAAGATGGGAAAGAG     | F1 (Violette de Dauphine x M106-238) | 71                    | 36                       | 35                    | 71                         | 100.0                |
|             | R                  | ACACTCGGCATCAGGAGGTC        | F1 (Violette de Solies x VC-180)     | 58                    | 20                       | 38                    | 58                         | 100.0                |
|             |                    |                             | F1 (Royal Vineyard x VC-180)         | 62                    | 24                       | 38                    | 62                         | 100.0                |
|             |                    |                             | Cultivars                            | 56                    | 7                        | 49                    | 56                         | 100.0                |
| MADF7       | F                  | GCTGAAGAAGGTAATTAGAGC       | F1 (Violette de Dauphine x M106-238) | 71                    | 36                       | 35                    | 69                         | 97.2                 |
|             | R                  | GCTGAAGAAGAAGCTGAATTG       | F1 (Violette de Solies x VC-180)     | 58                    | 20                       | 38                    | 45                         | 77.6                 |
|             |                    |                             | F1 (Royal Vineyard x VC-180)         | 62                    | 24                       | 38                    | 57                         | 91.9                 |
|             |                    |                             | Cultivars                            | 56                    | 7                        | 49                    | 48                         | 85.7                 |

| species             | ID   | variety/accession name | sexuality | sampling location          | annotation | synonymous name   |
|---------------------|------|------------------------|-----------|----------------------------|------------|-------------------|
| <i>Ficus carica</i> | 0001 | Horaishi               | female    | FAFRC, BB Yukuhashi, Japan |            | Horaiigaki        |
|                     | 0002 | Toyomitsuhome          | female    | FAFRC, BB Yukuhashi, Japan |            |                   |
|                     | 0003 | Masui Dauphine         | female    | FAFRC, BB Yukuhashi, Japan |            |                   |
|                     | 0004 | caprifig 6085          | male      | FAFRC, BB Yukuhashi, Japan |            |                   |
|                     | 0005 | Capri Type             | male      | FAFRC, BB Yukuhashi, Japan |            |                   |
|                     | 0006 | Archipel               | female    | FAFRC, BB Yukuhashi, Japan |            |                   |
|                     | 0007 | Atena                  | female    | FAFRC, BB Yukuhashi, Japan |            |                   |
|                     | 0008 | Acherb Fangen Black    | female    | FAFRC, BB Yukuhashi, Japan |            |                   |
|                     | 0009 | Achicudo Argentiju     | female    | FAFRC, BB Yukuhashi, Japan |            |                   |
|                     | 0010 | Allison                | female    | FAFRC, BB Yukuhashi, Japan |            |                   |
|                     | 0011 | Ischia White           | female    | FAFRC, BB Yukuhashi, Japan |            |                   |
|                     | 0012 | Ischia Black           | female    | FAFRC, BB Yukuhashi, Japan |            |                   |
|                     | 0013 | Osborn Prolific        | female    | FAFRC, BB Yukuhashi, Japan |            |                   |
|                     | 0014 | Kadota                 | female    | FAFRC, BB Yukuhashi, Japan |            |                   |
|                     | 0015 | California Black       | female    | FAFRC, BB Yukuhashi, Japan |            |                   |
|                     | 0016 | King                   | female    | FAFRC, BB Yukuhashi, Japan |            |                   |
|                     | 0017 | Kohaku                 | female    | FAFRC, BB Yukuhashi, Japan |            | Daw Low           |
|                     | 0018 | Conadria               | female    | FAFRC, BB Yukuhashi, Japan |            |                   |
|                     | 0019 | San Pedro White        | female    | FAFRC, BB Yukuhashi, Japan |            |                   |
|                     | 0020 | Short Bridge           | female    | FAFRC, BB Yukuhashi, Japan |            |                   |
|                     | 0021 | Genoa White            | female    | FAFRC, BB Yukuhashi, Japan |            |                   |
|                     | 0022 | Zebra Sweet            | female    | FAFRC, BB Yukuhashi, Japan |            |                   |
|                     | 0023 | Celeste                | female    | FAFRC, BB Yukuhashi, Japan |            |                   |
|                     | 0024 | Tanikawa               | female    | FAFRC, BB Yukuhashi, Japan |            |                   |
|                     | 0025 | Chugoku                | female    | FAFRC, BB Yukuhashi, Japan |            |                   |
|                     | 0026 | Dreamy Sweet           | female    | FAFRC, BB Yukuhashi, Japan |            |                   |
|                     | 0027 | Negronne               | female    | FAFRC, BB Yukuhashi, Japan |            |                   |
|                     | 0028 | Noire de Caromb        | female    | FAFRC, BB Yukuhashi, Japan |            |                   |
|                     | 0029 | Negro Largo            | female    | FAFRC, BB Yukuhashi, Japan |            |                   |
|                     | 0030 | Banane                 | female    | FAFRC, BB Yukuhashi, Japan |            |                   |
|                     | 0031 | Palmata                | male      | FAFRC, BB Yukuhashi, Japan |            | <i>F. palmata</i> |
|                     | 0032 | Bellone                | female    | FAFRC, BB Yukuhashi, Japan |            |                   |
|                     | 0033 | Viollette de Sollies   | female    | FAFRC, BB Yukuhashi, Japan |            |                   |
|                     | 0034 | Viollette de Dauphine  | female    | FAFRC, BB Yukuhashi, Japan |            |                   |
|                     | 0035 | Burjassotte Greece     | female    | FAFRC, BB Yukuhashi, Japan |            |                   |
|                     | 0036 | Brunswick              | female    | FAFRC, BB Yukuhashi, Japan |            |                   |
|                     | 0037 | Bodyul                 | female    | FAFRC, BB Yukuhashi, Japan |            |                   |
|                     | 0038 | Boldido Negra          | female    | FAFRC, BB Yukuhashi, Japan |            |                   |
|                     | 0039 | White Adriatic         | female    | FAFRC, BB Yukuhashi, Japan |            |                   |
|                     | 0040 | White                  | female    | FAFRC, BB Yukuhashi, Japan |            |                   |
|                     | 0041 | Jordan                 | female    | FAFRC, BB Yukuhashi, Japan |            |                   |
|                     | 0042 | Lisa                   | female    | FAFRC, BB Yukuhashi, Japan |            |                   |
|                     | 0043 | Royal Vineyard         | female    | FAFRC, BB Yukuhashi, Japan |            |                   |
|                     | 0044 | 91031                  | female    | FAFRC, BB Yukuhashi, Japan |            |                   |
|                     | 0045 | 91032                  | female    | FAFRC, BB Yukuhashi, Japan |            |                   |
|                     | 0046 | 91033                  | female    | FAFRC, BB Yukuhashi, Japan |            |                   |
|                     | 0047 | Violette de Bordeaux   | female    | FAFRC, BB Yukuhashi, Japan |            |                   |
|                     | 0048 | Black Fig              | female    | FAFRC, BB Yukuhashi, Japan |            |                   |
|                     | 0049 | Brown Turkey           | female    | FAFRC, BB Yukuhashi, Japan |            |                   |
|                     | 0050 | Cola Branchire         | female    | FAFRC, BB Yukuhashi, Japan |            |                   |
|                     | 0051 | Dieredo                | female    | FAFRC, BB Yukuhashi, Japan |            |                   |
|                     | 0052 | Du Roi                 | female    | FAFRC, BB Yukuhashi, Japan |            |                   |
|                     | 0053 | HAA9                   | female    | FAFRC, BB Yukuhashi, Japan |            |                   |
|                     | 0054 | Kalmon                 | female    | FAFRC, BB Yukuhashi, Japan |            |                   |
|                     | 0055 | Permicula Mitis        | female    | FAFRC, BB Yukuhashi, Japan |            |                   |
|                     | 0056 | San Pietro             | female    | FAFRC, BB Yukuhashi, Japan |            |                   |
|                     | 0057 | Sari Lop               | female    | FAFRC, BB Yukuhashi, Japan |            |                   |
|                     | 0058 | Standord               | female    | FAFRC, BB Yukuhashi, Japan |            |                   |
|                     | 0059 | Verbena                | female    | FAFRC, BB Yukuhashi, Japan |            |                   |
|                     | 0060 | Zidi                   | female    | FAFRC, BB Yukuhashi, Japan |            |                   |

## Supplementary Table S9. Material list for GWAS of sex determination

|      |            |          |                            |               |
|------|------------|----------|----------------------------|---------------|
| 1001 | VC-106     | bisexual | FAFRC, BB Yukuhashi, Japan | parental line |
| 1002 | VC-180     | bisexual | FAFRC, BB Yukuhashi, Japan | parental line |
| 1003 | H238-107   | bisexual | FAFRC, BB Yukuhashi, Japan | parental line |
| 1004 | M238-1     | bisexual | FAFRC, BB Yukuhashi, Japan | parental line |
| 1006 | VS238-53   | bisexual | FAFRC, BB Yukuhashi, Japan | parental line |
| 1008 | V13-37     | bisexual | FAFRC, BB Yukuhashi, Japan | parental line |
| 1009 | CH-27      | bisexual | FAFRC, BB Yukuhashi, Japan | parental line |
| 1010 | CM-15      | bisexual | FAFRC, BB Yukuhashi, Japan | parental line |
| 1011 | VHV-57     | bisexual | FAFRC, BB Yukuhashi, Japan | parental line |
| 1012 | VHV-6      | bisexual | FAFRC, BB Yukuhashi, Japan | parental line |
| 1013 | H180-156   | female   | FAFRC, BB Yukuhashi, Japan | parental line |
| 1014 | H180-2     | female   | FAFRC, BB Yukuhashi, Japan | parental line |
| 1017 | M106-238   | bisexual | FAFRC, BB Yukuhashi, Japan | parental line |
| 1018 | G180-73    | female   | FAFRC, BB Yukuhashi, Japan | parental line |
| 1021 | VD238-84   | female   | FAFRC, BB Yukuhashi, Japan | parental line |
| 1022 | VD238-96   | female   | FAFRC, BB Yukuhashi, Japan | parental line |
| 1023 | MH84       | female   | FAFRC, BB Yukuhashi, Japan | parental line |
| 1024 | G73-51     | female   | FAFRC, BB Yukuhashi, Japan | parental line |
| 1025 | H156-2     | female   | FAFRC, BB Yukuhashi, Japan | parental line |
| 1026 | H156-42    | female   | FAFRC, BB Yukuhashi, Japan | parental line |
| 1027 | V13-79     | female   | FAFRC, BB Yukuhashi, Japan | parental line |
| 1028 | H156-57    | bisexual | FAFRC, BB Yukuhashi, Japan | parental line |
| 1029 | H156-59    | female   | FAFRC, BB Yukuhashi, Japan | parental line |
| 1031 | NVD30      | female   | FAFRC, BB Yukuhashi, Japan | parental line |
| 1032 | NVD6       | female   | FAFRC, BB Yukuhashi, Japan | parental line |
| 1033 | HIG24      | female   | FAFRC, BB Yukuhashi, Japan | parental line |
| 1034 | VDV35      | female   | FAFRC, BB Yukuhashi, Japan | parental line |
| 1035 | VHV3       | female   | FAFRC, BB Yukuhashi, Japan | parental line |
| 1036 | CHEO-15    | unknown  | FAFRC, BB Yukuhashi, Japan | parental line |
| 1037 | HICHI13-8  | unknown  | FAFRC, BB Yukuhashi, Japan | parental line |
| 1038 | TV-20      | female   | FAFRC, BB Yukuhashi, Japan | parental line |
| 1040 | NVD6CH-33  | female   | FAFRC, BB Yukuhashi, Japan | parental line |
| 1041 | NVD6G-11   | female   | FAFRC, BB Yukuhashi, Japan | parental line |
| 1042 | NVD6G-23   | female   | FAFRC, BB Yukuhashi, Japan | parental line |
| 1043 | NVD6G-31   | female   | FAFRC, BB Yukuhashi, Japan | parental line |
| 1044 | NVD6G-39   | female   | FAFRC, BB Yukuhashi, Japan | parental line |
| 1045 | NVD6G-44   | female   | FAFRC, BB Yukuhashi, Japan | parental line |
| 1046 | NVD6VHV-17 | female   | FAFRC, BB Yukuhashi, Japan | parental line |
| 1047 | NVD6VHV-27 | female   | FAFRC, BB Yukuhashi, Japan | parental line |
| 1048 | NVD6VHV-34 | female   | FAFRC, BB Yukuhashi, Japan | parental line |
| 1049 | NVD6VHV-43 | female   | FAFRC, BB Yukuhashi, Japan | parental line |
| 1050 | NVD6VHV-46 | female   | FAFRC, BB Yukuhashi, Japan | parental line |
| 1051 | NVD6VHV-48 | female   | FAFRC, BB Yukuhashi, Japan | parental line |
| 1052 | NVD6VHV-50 | female   | FAFRC, BB Yukuhashi, Japan | parental line |
| 1053 | NVD6VS-12  | female   | FAFRC, BB Yukuhashi, Japan | parental line |
| 1054 | NVD6VS-15  | female   | FAFRC, BB Yukuhashi, Japan | parental line |
| 1055 | NVD6VS-2   | female   | FAFRC, BB Yukuhashi, Japan | parental line |
| 1056 | NVD6VS-29  | female   | FAFRC, BB Yukuhashi, Japan | parental line |
| 1057 | NVD6CH-46  | unknown  | FAFRC, BB Yukuhashi, Japan | parental line |
| 1058 | NH46       | female   | FAFRC, BB Yukuhashi, Japan | parental line |
| 1059 | VD238-83   | bisexual | FAFRC, BB Yukuhashi, Japan | parental line |
| 1060 | V13-73     | female   | FAFRC, BB Yukuhashi, Japan | parental line |
| 1061 | TNG21      | female   | FAFRC, BB Yukuhashi, Japan | parental line |
| 1062 | TNG23      | female   | FAFRC, BB Yukuhashi, Japan | parental line |
| 1063 | TNG25      | female   | FAFRC, BB Yukuhashi, Japan | parental line |
| 1064 | VC-119     | bisexual | FAFRC, BB Yukuhashi, Japan | parental line |
| 1065 | NVD27      | bisexual | FAFRC, BB Yukuhashi, Japan | parental line |
| 1066 | CM-1       | bisexual | FAFRC, BB Yukuhashi, Japan | parental line |
| 1067 | G180-8     | bisexual | FAFRC, BB Yukuhashi, Japan | parental line |
| 1068 | NG-13      | female   | FAFRC, BB Yukuhashi, Japan | parental line |
| 1069 | NG-60      | bisexual | FAFRC, BB Yukuhashi, Japan | parental line |
| 1076 | H70NG60    | bisexual | FAFRC, BB Yukuhashi, Japan | parental line |

## Supplementary Table S9. Material list for GWAS of sex determination (Continued)

| ID   | raw read  | input     | pair aligned | single aligned | total aligned | alignment rate |
|------|-----------|-----------|--------------|----------------|---------------|----------------|
| 0001 | 2,129,684 | 2,093,842 | 1,458,958    | 99,905         | 1,558,863     | 74.45%         |
| 0002 | 2,079,030 | 2,048,347 | 1,353,944    | 139,853        | 1,493,797     | 72.93%         |
| 0003 | 2,092,026 | 2,060,860 | 1,333,822    | 118,844        | 1,452,666     | 70.49%         |
| 0004 | 2,451,306 | 2,414,685 | 1,706,406    | 137,290        | 1,843,696     | 76.35%         |
| 0005 | 2,098,674 | 2,068,958 | 1,437,560    | 130,930        | 1,568,490     | 75.81%         |
| 0006 | 1,873,528 | 1,843,347 | 1,259,622    | 111,271        | 1,370,893     | 74.37%         |
| 0007 | 2,232,642 | 2,193,649 | 1,532,924    | 132,607        | 1,665,531     | 75.93%         |
| 0008 | 2,084,706 | 2,054,171 | 1,342,990    | 112,458        | 1,455,448     | 70.85%         |
| 0009 | 2,069,074 | 2,035,818 | 1,300,424    | 136,279        | 1,436,703     | 70.57%         |
| 0010 | 2,301,182 | 2,263,432 | 1,603,348    | 134,481        | 1,737,829     | 76.78%         |
| 0011 | 2,151,004 | 2,118,270 | 1,460,444    | 133,964        | 1,594,408     | 75.27%         |
| 0012 | 2,472,494 | 2,435,635 | 1,622,656    | 159,072        | 1,781,728     | 73.15%         |
| 0013 | 2,381,834 | 2,349,560 | 1,554,382    | 157,713        | 1,712,095     | 72.87%         |
| 0014 | 2,261,398 | 2,226,981 | 1,509,816    | 144,267        | 1,654,083     | 74.27%         |
| 0015 | 2,520,478 | 2,482,998 | 1,654,860    | 162,519        | 1,817,379     | 73.19%         |
| 0016 | 2,107,988 | 2,074,702 | 1,470,180    | 104,944        | 1,575,124     | 75.92%         |
| 0017 | 2,509,920 | 2,470,471 | 1,675,032    | 141,210        | 1,816,242     | 73.52%         |
| 0018 | 2,536,990 | 2,501,575 | 1,702,386    | 168,310        | 1,870,696     | 74.78%         |
| 0019 | 2,330,204 | 2,298,683 | 1,569,426    | 151,374        | 1,720,800     | 74.86%         |
| 0020 | 2,536,698 | 2,499,902 | 1,620,628    | 184,840        | 1,805,468     | 72.22%         |
| 0021 | 2,629,716 | 2,593,679 | 1,754,490    | 171,404        | 1,925,894     | 74.25%         |
| 0022 | 2,540,608 | 2,502,233 | 1,664,630    | 176,445        | 1,841,075     | 73.58%         |
| 0023 | 2,766,024 | 2,723,459 | 1,855,670    | 178,885        | 2,034,555     | 74.70%         |
| 0024 | 2,656,480 | 2,617,997 | 1,832,592    | 155,688        | 1,988,280     | 75.95%         |
| 0025 | 2,482,656 | 2,447,076 | 1,634,156    | 168,224        | 1,802,380     | 73.65%         |
| 0026 | 2,464,066 | 2,427,815 | 1,606,544    | 163,497        | 1,770,041     | 72.91%         |
| 0027 | 2,258,710 | 2,225,936 | 1,516,592    | 157,282        | 1,673,874     | 75.20%         |
| 0028 | 2,324,698 | 2,289,213 | 1,465,660    | 168,272        | 1,633,932     | 71.38%         |
| 0029 | 2,558,536 | 2,521,689 | 1,704,644    | 166,904        | 1,871,548     | 74.22%         |
| 0030 | 2,170,968 | 2,140,694 | 1,431,060    | 162,828        | 1,593,888     | 74.46%         |
| 0031 | 2,554,794 | 2,517,607 | 1,756,924    | 168,690        | 1,925,614     | 76.49%         |
| 0032 | 2,426,830 | 2,389,982 | 1,637,852    | 140,384        | 1,778,236     | 74.40%         |
| 0033 | 2,370,626 | 2,334,262 | 1,446,960    | 150,347        | 1,597,307     | 68.43%         |
| 0034 | 2,456,130 | 2,421,336 | 1,631,560    | 166,730        | 1,798,290     | 74.27%         |
| 0035 | 2,305,224 | 2,273,219 | 1,497,706    | 164,332        | 1,662,038     | 73.11%         |
| 0036 | 2,390,940 | 2,356,465 | 1,578,608    | 166,191        | 1,744,799     | 74.04%         |
| 0037 | 2,456,068 | 2,422,015 | 1,612,788    | 168,727        | 1,781,515     | 73.56%         |
| 0038 | 2,505,694 | 2,471,307 | 1,589,840    | 169,833        | 1,759,673     | 71.20%         |
| 0039 | 2,609,546 | 2,572,294 | 1,564,982    | 188,581        | 1,753,563     | 68.17%         |
| 0040 | 2,491,880 | 2,454,321 | 1,571,056    | 168,056        | 1,739,112     | 70.86%         |
| 0041 | 2,731,638 | 2,689,145 | 1,801,058    | 183,942        | 1,985,000     | 73.82%         |
| 0042 | 2,347,082 | 2,312,170 | 1,536,240    | 162,529        | 1,698,769     | 73.47%         |
| 0043 | 2,421,290 | 2,386,434 | 1,590,644    | 163,086        | 1,753,730     | 73.49%         |
| 0044 | 2,570,592 | 2,533,013 | 1,669,258    | 188,554        | 1,857,812     | 73.34%         |
| 0045 | 2,696,624 | 2,658,267 | 1,686,154    | 200,909        | 1,887,063     | 70.99%         |
| 0046 | 2,534,878 | 2,499,976 | 1,685,946    | 167,093        | 1,853,039     | 74.12%         |
| 0047 | 2,794,330 | 2,751,128 | 1,822,172    | 189,318        | 2,011,490     | 73.12%         |
| 0048 | 2,545,142 | 2,507,465 | 1,665,798    | 172,927        | 1,838,725     | 73.33%         |
| 0049 | 2,433,584 | 2,399,934 | 1,611,134    | 152,131        | 1,763,265     | 73.47%         |
| 0050 | 2,289,462 | 2,258,339 | 1,360,662    | 165,005        | 1,525,667     | 67.56%         |
| 0051 | 2,207,150 | 2,178,329 | 1,447,292    | 155,870        | 1,603,162     | 73.60%         |
| 0052 | 2,181,298 | 2,151,092 | 1,428,660    | 162,303        | 1,590,963     | 73.96%         |
| 0053 | 2,326,256 | 2,296,246 | 1,489,126    | 175,983        | 1,665,109     | 72.51%         |
| 0054 | 2,523,752 | 2,489,163 | 1,654,122    | 185,002        | 1,839,124     | 73.89%         |
| 0055 | 2,411,630 | 2,378,169 | 1,568,340    | 179,549        | 1,747,889     | 73.50%         |
| 0056 | 2,423,076 | 2,389,848 | 1,558,256    | 169,423        | 1,727,679     | 72.29%         |
| 0057 | 2,551,144 | 2,512,992 | 1,642,920    | 176,884        | 1,819,804     | 72.42%         |
| 0058 | 2,499,134 | 2,462,166 | 1,604,302    | 163,797        | 1,768,099     | 71.81%         |
| 0059 | 2,256,208 | 2,225,794 | 1,488,728    | 156,908        | 1,645,636     | 73.93%         |
| 0060 | 2,639,348 | 2,601,146 | 1,523,892    | 138,564        | 1,662,456     | 63.91%         |

**Supplementary Table S10.** The RAD-seq alignment results of 122 cultivars/parent lines for GWAS.

**Supplementary Table S10.** The RAD-seq alignment results of 122 cultivars/parent lines for GWAS (Continued)

|         |             |             |             |            |             |        |
|---------|-------------|-------------|-------------|------------|-------------|--------|
| 1001    | 2,380,532   | 2,340,973   | 1,650,436   | 126,795    | 1,777,231   | 75.92% |
| 1002    | 2,094,072   | 2,063,832   | 1,472,832   | 118,665    | 1,591,497   | 77.11% |
| 1003    | 2,528,680   | 2,490,728   | 1,798,212   | 130,103    | 1,928,315   | 77.42% |
| 1004    | 2,125,508   | 2,090,348   | 1,455,440   | 124,441    | 1,579,881   | 75.58% |
| 1006    | 2,179,678   | 2,145,108   | 1,483,016   | 125,625    | 1,608,641   | 74.99% |
| 1008    | 1,783,744   | 1,755,864   | 1,279,542   | 76,039     | 1,355,581   | 77.20% |
| 1009    | 1,972,638   | 1,933,609   | 1,296,874   | 132,685    | 1,429,559   | 73.93% |
| 1010    | 1,377,966   | 1,347,630   | 981,606     | 37,040     | 1,018,646   | 75.59% |
| 1011    | 2,489,734   | 2,446,421   | 1,690,582   | 151,198    | 1,841,780   | 75.28% |
| 1012    | 2,149,898   | 2,117,367   | 1,496,766   | 131,078    | 1,627,844   | 76.88% |
| 1013    | 2,345,418   | 2,307,990   | 1,627,588   | 144,742    | 1,772,330   | 76.79% |
| 1014    | 2,208,152   | 2,171,332   | 1,525,702   | 140,990    | 1,666,692   | 76.76% |
| 1017    | 2,021,360   | 1,988,491   | 1,373,934   | 129,345    | 1,503,279   | 75.60% |
| 1018    | 1,928,374   | 1,896,331   | 1,305,988   | 115,510    | 1,421,498   | 74.96% |
| 1021    | 2,275,974   | 2,236,773   | 1,562,542   | 129,566    | 1,692,108   | 75.65% |
| 1022    | 1,482,166   | 1,449,291   | 1,105,210   | 43,896     | 1,149,106   | 79.29% |
| 1023    | 2,138,298   | 2,093,177   | 1,517,630   | 91,344     | 1,608,974   | 76.87% |
| 1024    | 2,160,378   | 2,123,484   | 1,479,588   | 131,682    | 1,611,270   | 75.88% |
| 1025    | 2,059,524   | 2,023,152   | 1,399,498   | 130,637    | 1,530,135   | 75.63% |
| 1026    | 2,065,556   | 2,029,285   | 1,464,170   | 123,193    | 1,587,363   | 78.22% |
| 1027    | 1,862,676   | 1,829,831   | 1,306,850   | 110,055    | 1,416,905   | 77.43% |
| 1028    | 1,865,114   | 1,833,653   | 1,280,248   | 105,829    | 1,386,077   | 75.59% |
| 1029    | 2,054,728   | 2,019,394   | 1,367,438   | 144,324    | 1,511,762   | 74.86% |
| 1031    | 1,543,246   | 1,514,135   | 1,063,166   | 69,546     | 1,132,712   | 74.81% |
| 1032    | 2,646,010   | 2,598,628   | 1,823,170   | 155,315    | 1,978,485   | 76.14% |
| 1033    | 2,104,054   | 2,067,536   | 1,412,208   | 133,201    | 1,545,409   | 74.75% |
| 1034    | 2,407,858   | 2,367,255   | 1,656,350   | 143,743    | 1,800,093   | 76.04% |
| 1035    | 2,139,690   | 2,102,198   | 1,464,746   | 139,462    | 1,604,208   | 76.31% |
| 1036    | 2,185,456   | 2,148,439   | 1,503,282   | 131,740    | 1,635,022   | 76.10% |
| 1037    | 2,076,486   | 2,042,062   | 1,397,922   | 129,277    | 1,527,199   | 74.79% |
| 1038    | 2,502,290   | 2,456,749   | 1,729,648   | 149,089    | 1,878,737   | 76.47% |
| 1040    | 2,182,430   | 2,140,374   | 1,487,936   | 93,788     | 1,581,724   | 73.90% |
| 1041    | 2,156,106   | 2,117,919   | 1,502,486   | 110,431    | 1,612,917   | 76.16% |
| 1042    | 2,202,898   | 2,164,003   | 1,486,278   | 145,924    | 1,632,202   | 75.43% |
| 1043    | 2,529,164   | 2,486,183   | 1,748,434   | 159,678    | 1,908,112   | 76.75% |
| 1044    | 2,309,604   | 2,273,581   | 1,572,086   | 142,470    | 1,714,556   | 75.41% |
| 1045    | 1,919,138   | 1,886,242   | 1,299,262   | 123,527    | 1,422,789   | 75.43% |
| 1046    | 1,826,286   | 1,795,727   | 1,252,566   | 111,165    | 1,363,731   | 75.94% |
| 1047    | 2,159,996   | 2,122,978   | 1,462,608   | 135,835    | 1,598,443   | 75.29% |
| 1048    | 1,988,062   | 1,954,957   | 1,408,068   | 91,285     | 1,499,353   | 76.69% |
| 1049    | 2,579,770   | 2,535,946   | 1,762,820   | 152,148    | 1,914,968   | 75.51% |
| 1050    | 2,345,248   | 2,306,247   | 1,663,922   | 134,621    | 1,798,543   | 77.99% |
| 1051    | 2,140,950   | 2,105,523   | 1,449,724   | 133,881    | 1,583,605   | 75.21% |
| 1052    | 2,092,938   | 2,057,128   | 1,455,902   | 127,705    | 1,583,607   | 76.98% |
| 1053    | 2,151,512   | 2,112,803   | 1,470,566   | 129,336    | 1,599,902   | 75.72% |
| 1054    | 2,008,160   | 1,971,862   | 1,381,532   | 114,566    | 1,496,098   | 75.87% |
| 1055    | 2,233,774   | 2,193,709   | 1,544,472   | 135,944    | 1,680,416   | 76.60% |
| 1056    | 1,915,080   | 1,879,732   | 1,339,878   | 89,221     | 1,429,099   | 76.03% |
| 1057    | 2,302,582   | 2,256,746   | 1,601,046   | 122,688    | 1,723,734   | 76.38% |
| 1058    | 2,351,286   | 2,308,340   | 1,579,324   | 134,284    | 1,713,608   | 74.24% |
| 1059    | 2,466,262   | 2,419,409   | 1,730,624   | 162,319    | 1,892,943   | 78.24% |
| 1060    | 2,514,002   | 2,468,984   | 1,654,458   | 168,805    | 1,823,263   | 73.85% |
| 1061    | 2,247,840   | 2,205,749   | 1,574,198   | 134,359    | 1,708,557   | 77.46% |
| 1062    | 2,106,768   | 2,068,052   | 1,428,862   | 128,511    | 1,557,373   | 75.31% |
| 1063    | 2,461,918   | 2,413,467   | 1,644,438   | 156,151    | 1,800,589   | 74.61% |
| 1064    | 2,048,108   | 2,008,797   | 1,388,362   | 115,234    | 1,503,596   | 74.85% |
| 1065    | 2,555,974   | 2,508,579   | 1,717,038   | 156,776    | 1,873,814   | 74.70% |
| 1066    | 2,266,854   | 2,227,977   | 1,517,476   | 146,169    | 1,663,645   | 74.67% |
| 1067    | 2,175,930   | 2,136,717   | 1,505,644   | 133,385    | 1,639,029   | 76.71% |
| 1068    | 1,993,126   | 1,954,712   | 1,302,494   | 130,612    | 1,433,106   | 73.32% |
| 1069    | 2,321,468   | 2,279,143   | 1,574,992   | 143,759    | 1,718,751   | 75.41% |
| 1076    | 2,074,932   | 2,039,431   | 1,425,056   | 127,732    | 1,552,788   | 76.14% |
| Total   | 277,808,096 | 273,351,384 | 186,263,562 | 17,331,672 | 203,595,234 |        |
| Average | 2,277,116   | 2,240,585   | 1,526,751   | 142,063    | 1,668,813   | 74.60% |



| ID   | sexuality | seq000259 SNP position |      |       |        |        |        |        |        |        |        |        |
|------|-----------|------------------------|------|-------|--------|--------|--------|--------|--------|--------|--------|--------|
|      |           | 8998                   | 9255 | 39953 | 100369 | 100417 | 100426 | 100428 | 134172 | 134173 | 134177 | 134322 |
| 0004 | bisexual  | M                      | R    | W     | K      | W      | Y      | M      | A      | G      | A      | A      |
| 0005 | bisexual  | M                      | R    | W     | K      | W      | Y      | M      | R      | R      | R      | R      |
| 1001 | bisexual  | M                      | R    | W     | K      | W      | Y      | M      | R      | R      | R      | R      |
| 1002 | bisexual  | M                      | R    | W     | K      | W      | Y      | M      | A      | G      | A      | A      |
| 1003 | bisexual  | M                      | R    | W     | K      | W      | Y      | M      | R      | R      | R      | R      |
| 1004 | bisexual  | M                      | R    | W     | K      | A      | C      | C      | R      | R      | R      | R      |
| 1006 | bisexual  | M                      | R    | W     | K      | W      | Y      | M      | R      | R      | R      | R      |
| 1008 | bisexual  | M                      | R    | W     | K      | W      | Y      | M      | R      | R      | R      | R      |
| 1009 | bisexual  | M                      | R    | W     | K      | W      | Y      | M      | G      | A      | G      | G      |
| 1010 | bisexual  | M                      | R    | W     | K      | W      | Y      | M      | R      | R      | R      | R      |
| 1011 | bisexual  | M                      | R    | W     | K      | A      | C      | C      | A      | G      | A      | A      |
| 1012 | bisexual  | M                      | R    | W     | K      | W      | Y      | M      | R      | R      | R      | R      |
| 1017 | bisexual  | M                      | R    | W     | K      | A      | C      | C      | R      | R      | R      | R      |
| 1028 | bisexual  | M                      | R    | W     | K      | W      | Y      | M      | A      | G      | A      | A      |
| 1059 | bisexual  | M                      | R    | W     | K      | W      | Y      | M      | G      | A      | G      | G      |
| 1064 | bisexual  | M                      | R    | W     | K      | A      | C      | C      | A      | G      | A      | A      |
| 1065 | bisexual  | M                      | R    | W     | K      | A      | C      | C      | R      | R      | R      | R      |
| 1066 | bisexual  | M                      | R    | W     | K      | W      | Y      | M      | R      | R      | R      | R      |
| 1067 | bisexual  | M                      | R    | W     | K      | A      | C      | C      | R      | R      | R      | R      |
| 1069 | bisexual  | M                      | R    | W     | K      | W      | Y      | M      | R      | R      | R      | R      |
| 1076 | bisexual  | M                      | R    | W     | K      | A      | C      | C      | A      | G      | A      | A      |
| 0001 | female    | A                      | A    | A     | G      | T      | T      | A      | G      | A      | G      | G      |
| 0002 | female    | A                      | A    | A     | G      | W      | Y      | M      | R      | R      | R      | R      |
| 0003 | female    | A                      | A    | A     | G      | W      | Y      | M      | R      | R      | R      | R      |
| 0006 | female    | A                      | A    | A     | G      | W      | Y      | M      | R      | R      | R      | R      |
| 0007 | female    | A                      | A    | A     | G      | W      | Y      | M      | R      | R      | R      | R      |
| 0008 | female    | A                      | A    | A     | G      | W      | Y      | M      | G      | A      | G      | G      |
| 0009 | female    | A                      | A    | A     | G      | T      | T      | A      | G      | A      | G      | G      |
| 0010 | female    | A                      | A    | A     | G      | W      | Y      | M      | R      | R      | R      | R      |
| 0011 | female    | A                      | A    | A     | G      | T      | T      | A      | G      | R      | G      | G      |
| 0012 | female    | A                      | A    | A     | G      | W      | Y      | M      | R      | R      | R      | R      |
| 0013 | female    | A                      | A    | A     | G      | W      | Y      | M      | R      | R      | R      | R      |
| 0014 | female    | A                      | A    | A     | G      | W      | Y      | M      | R      | R      | R      | R      |
| 0015 | female    | A                      | A    | A     | G      | T      | T      | A      | A      | G      | A      | A      |
| 0016 | female    | A                      | A    | A     | G      | W      | Y      | M      | R      | R      | R      | R      |
| 0017 | female    | A                      | A    | A     | G      | W      | Y      | M      | G      | A      | G      | G      |
| 0018 | female    | A                      | A    | A     | G      | T      | T      | A      | G      | A      | G      | G      |
| 0019 | female    | A                      | A    | A     | G      | W      | T      | A      | R      | R      | R      | R      |
| 0020 | female    | A                      | A    | A     | G      | W      | Y      | M      | R      | R      | R      | R      |
| 0021 | female    | A                      | A    | A     | G      | W      | Y      | M      | G      | A      | G      | G      |
| 0022 | female    | A                      | A    | A     | G      | W      | Y      | M      | G      | A      | G      | G      |
| 0023 | female    | A                      | A    | A     | G      | T      | T      | A      | G      | A      | G      | G      |
| 0024 | female    | A                      | A    | A     | G      | T      | T      | A      | G      | A      | G      | G      |
| 0025 | female    | A                      | A    | A     | G      | T      | T      | A      | R      | R      | R      | R      |
| 0026 | female    | A                      | A    | A     | G      | W      | Y      | M      | G      | R      | G      | G      |
| 0027 | female    | A                      | A    | A     | G      | W      | Y      | M      | G      | A      | G      | G      |
| 0028 | female    | A                      | A    | A     | G      | T      | T      | A      | A      | G      | A      | A      |
| 0029 | female    | A                      | A    | A     | G      | W      | Y      | M      | G      | A      | G      | G      |
| 0030 | female    | A                      | A    | A     | G      | T      | T      | A      | R      | R      | R      | R      |
| 0031 | female    | M                      | A    | A     | G      | W      | Y      | M      | G      | G      | G      | G      |
| 0032 | female    | A                      | A    | A     | G      | T      | T      | A      | R      | R      | R      | R      |
| 0033 | female    | A                      | A    | A     | G      | T      | T      | A      | R      | R      | R      | R      |
| 0034 | female    | A                      | A    | A     | G      | W      | Y      | M      | R      | R      | R      | R      |
| 0035 | female    | A                      | A    | A     | G      | T      | T      | A      | R      | R      | R      | R      |
| 0036 | female    | A                      | A    | A     | G      | W      | Y      | M      | G      | A      | G      | G      |
| 0037 | female    | A                      | A    | A     | G      | W      | Y      | M      | G      | A      | G      | G      |
| 0038 | female    | A                      | A    | A     | G      | W      | Y      | M      | G      | A      | G      | G      |
| 0039 | female    | A                      | A    | A     | G      | W      | Y      | M      | R      | R      | R      | R      |
| 0040 | female    | A                      | A    | A     | G      | T      | T      | A      | G      | R      | G      | G      |

**Supplementary Table S11.** SNP position genotypes of seq000259 scaffold in GWAS materials.

|      |         |   |   |   |   |   |   |   |   |   |   |   |
|------|---------|---|---|---|---|---|---|---|---|---|---|---|
| 0041 | female  | A | A | A | G | T | T | A | R | R | R | R |
| 0042 | female  | A | A | A | G | W | Y | M | R | R | R | R |
| 0043 | female  | A | A | A | G | W | Y | M | G | A | G | G |
| 0044 | female  | A | A | A | G | T | T | A | G | A | G | G |
| 0045 | female  | A | A | A | G | T | T | A | A | G | A | A |
| 0046 | female  | A | A | A | G | T | T | A | A | G | A | A |
| 0047 | female  | A | A | A | G | T | T | A | R | R | R | R |
| 0048 | female  | A | A | A | G | W | Y | M | G | A | G | G |
| 0049 | female  | A | A | A | G | T | T | A | R | R | R | R |
| 0050 | female  | A | A | A | G | T | T | A | R | R | R | R |
| 0051 | female  | A | A | A | G | T | T | A | R | R | R | R |
| 0052 | female  | A | A | A | G | W | Y | M | G | A | G | G |
| 0053 | female  | A | A | A | G | T | T | A | G | A | G | G |
| 0054 | female  | A | A | A | G | W | Y | M | R | R | R | R |
| 0055 | female  | A | A | A | G | T | T | A | R | R | R | R |
| 0056 | female  | A | A | A | G | T | T | A | G | R | G | G |
| 0057 | female  | A | A | A | G | T | T | A | G | A | G | G |
| 0058 | female  | A | A | A | G | T | T | A | G | A | G | G |
| 0059 | female  | A | A | A | G | W | Y | M | R | R | R | R |
| 0060 | female  | A | A | A | G | T | T | A | G | A | G | G |
| 1013 | female  | A | A | A | G | T | T | A | R | R | R | R |
| 1014 | female  | A | A | A | G | T | T | A | R | R | R | R |
| 1018 | female  | A | A | A | G | T | T | A | R | R | R | R |
| 1021 | female  | A | A | A | G | W | Y | M | R | R | R | R |
| 1022 | female  | A | A | A | G | A | C | C | G | A | G | G |
| 1023 | female  | A | A | A | G | W | Y | M | R | R | R | R |
| 1024 | female  | A | A | A | G | W | Y | M | A | G | A | A |
| 1025 | female  | A | A | A | G | W | Y | M | R | R | R | R |
| 1026 | female  | A | A | A | G | W | Y | M | A | G | A | A |
| 1027 | female  | A | A | A | G | W | Y | M | R | R | R | R |
| 1029 | female  | A | A | A | G | W | Y | M | R | R | R | R |
| 1031 | female  | A | A | A | G | W | Y | M | R | R | R | R |
| 1032 | female  | A | A | A | G | T | T | A | R | R | R | R |
| 1033 | female  | A | A | A | G | T | T | A | G | A | G | G |
| 1034 | female  | A | A | A | G | W | Y | M | A | G | A | A |
| 1035 | female  | A | A | A | G | T | T | A | G | A | G | G |
| 1038 | female  | A | A | A | G | T | T | A | G | A | G | G |
| 1040 | female  | A | A | A | G | T | T | A | R | R | R | R |
| 1041 | female  | A | A | A | G | T | T | A | R | R | R | R |
| 1042 | female  | A | A | A | G | T | T | A | R | R | R | R |
| 1043 | female  | A | A | A | G | T | T | A | G | A | G | G |
| 1044 | female  | A | A | A | G | T | T | A | R | R | R | R |
| 1045 | female  | A | A | A | G | T | T | A | A | G | A | A |
| 1046 | female  | A | A | A | G | T | T | A | R | R | R | R |
| 1047 | female  | A | A | A | G | T | T | A | R | R | R | R |
| 1048 | female  | A | A | A | G | T | T | A | R | R | R | R |
| 1049 | female  | A | A | A | G | T | T | A | R | R | R | R |
| 1050 | female  | A | A | A | G | T | T | A | A | G | A | A |
| 1051 | female  | A | A | A | G | T | T | A | A | G | A | A |
| 1052 | female  | A | A | A | G | T | T | A | R | R | R | R |
| 1053 | female  | A | A | A | G | T | T | A | R | R | R | R |
| 1054 | female  | A | A | A | G | T | T | A | A | G | A | A |
| 1055 | female  | A | A | A | G | T | T | A | R | R | R | R |
| 1056 | female  | A | A | A | G | T | T | A | G | A | G | G |
| 1058 | female  | A | A | A | G | T | T | A | G | A | G | G |
| 1060 | female  | A | A | A | G | W | Y | M | R | R | R | R |
| 1061 | female  | A | A | A | G | T | T | A | R | R | R | R |
| 1062 | female  | A | A | A | G | W | Y | M | R | R | R | R |
| 1063 | female  | A | A | A | G | T | T | A | R | R | R | R |
| 1068 | female  | A | A | A | G | W | Y | M | G | A | G | G |
| 1036 | unknown | A | A | A | G | T | T | A | G | A | G | G |
| 1037 | unknown | M | R | W | K | W | Y | M | R | R | R | R |
| 1057 | unknown | M | R | W | K | W | Y | M | R | R | R | R |

**Supplementary Table S11.** SNP position genotypes of seq000259 scaffold in GWAS materials. (Continued)

**Supplementary Table S12.** Male material list for SNPs sequencing.

| species          | ID   | variety/accession name | sexuality | sampling location          | annotation      |
|------------------|------|------------------------|-----------|----------------------------|-----------------|
| <i>F. carica</i> | 1001 | VC-106                 | male      | FAFRC, BB Yukuhashi, Japan | breeding parent |
|                  | 1002 | VC-180                 | male      | FAFRC, BB Yukuhashi, Japan | breeding parent |
|                  | 1003 | H238-107               | male      | FAFRC, BB Yukuhashi, Japan | breeding parent |
|                  | 1004 | M238-1                 | male      | FAFRC, BB Yukuhashi, Japan | breeding parent |
|                  | 1006 | VS238-53               | male      | FAFRC, BB Yukuhashi, Japan | breeding parent |
|                  | 1008 | V13-37                 | male      | FAFRC, BB Yukuhashi, Japan | breeding parent |
|                  | 1009 | CH-27                  | male      | FAFRC, BB Yukuhashi, Japan | breeding parent |
|                  | 1010 | CM-15                  | male      | FAFRC, BB Yukuhashi, Japan | breeding parent |
|                  | 1011 | VHV-57                 | male      | FAFRC, BB Yukuhashi, Japan | breeding parent |
|                  | 1012 | VHV-6                  | male      | FAFRC, BB Yukuhashi, Japan | breeding parent |
|                  | 1059 | VD238-83               | male      | FAFRC, BB Yukuhashi, Japan | breeding parent |
|                  | 1064 | VC-119                 | male      | FAFRC, BB Yukuhashi, Japan | breeding parent |
|                  | 1065 | NVD27                  | male      | FAFRC, BB Yukuhashi, Japan | breeding parent |
|                  | 1066 | CM-1                   | male      | FAFRC, BB Yukuhashi, Japan | breeding parent |
|                  | 1067 | G180-8                 | male      | FAFRC, BB Yukuhashi, Japan | breeding parent |
|                  | 1069 | NG-60                  | male      | FAFRC, BB Yukuhashi, Japan | breeding parent |
|                  | 1076 | H70NG60                | male      | FAFRC, BB Yukuhashi, Japan | breeding parent |
|                  | 0031 | Palmata                | male      | FAFRC, BB Yukuhashi, Japan | variety         |
